1 **Horizontal gene transfer as an indispensable driver for Neocallimastigomycota**  
2 **evolution into a distinct gut-dwelling fungal lineage**

3  
4 Chelsea L. Murphy<sup>1¶</sup>, Noha H. Youssef<sup>1¶</sup>, Radwa A. Hanafy<sup>1</sup>, MB Couger<sup>2</sup>, Jason E.  
5 Stajich<sup>3</sup>, Y. Wang<sup>3</sup>, Kristina Baker<sup>1</sup>, Sumit S. Dagar<sup>4</sup>, Gareth W. Griffith<sup>5</sup>, Ibrahim F.  
6 Farag<sup>1</sup>, TM Callaghan<sup>6</sup>, and Mostafa S. Elshahed<sup>1\*</sup>

7 <sup>1</sup>Department of Microbiology and Molecular Genetics and <sup>2</sup>High Performance Computing Center,  
8 Oklahoma State University, Stillwater, OK. <sup>3</sup>Department of Microbiology and Plant Pathology, Institute  
9 for Integrative Genome Biology, University of California-Riverside, Riverside, CA. Bioenergy group,  
10 Agharkar Research Institute, Pune, India. <sup>5</sup>Institute of Biological, Environmental, and Rural Sciences  
11 (IBERS) Aberystwyth University, Aberystwyth, Wales, UK. <sup>6</sup>Department for Quality Assurance and  
12 Analytics, Bavarian State Research Center for Agriculture, Freising, Germany.

13  
14  
15 Running Title: HGT in the Neocallimastigomycota

16  
17 \*Corresponding author: Mailing address: Oklahoma State University, Department of  
18 Microbiology and Molecular Genetics, 1110 S Innovation Way, Stillwater, OK 74074. Phone:  
19 (405) 744-3005, Fax: (405) 744-1112. Email: [Mostafa@okstate.edu](mailto:Mostafa@okstate.edu).

20  
21 ¶Both authors contributed equally to this work.

22

23  
24  
25  
26  
27  
28  
29  
30  
31  
32  
33  
34  
35  
36  
37  
38  
39  
40

## Abstract

Survival and growth of the anaerobic gut fungi (AGF, Neocallimastigomycota) in the herbivorous gut necessitate the possession of multiple abilities absent in other fungal lineages. We hypothesized that horizontal gene transfer (HGT) was instrumental in forging the evolution of AGF into a phylogenetically distinct gut-dwelling fungal lineage. Patterns of HGT were evaluated in the transcriptomes of 27 AGF strains, 22 of which were isolated and sequenced in this study, and 4 AGF genomes broadly covering the breadth of AGF diversity. We identified 327 distinct incidents of HGT in AGF transcriptomes, with subsequent gene duplication resulting in an HGT frequency of 2.9-4.1% in AGF genomes. The majority of HGT events were AGF specific (90.8%) and wide (67.3%), indicating their occurrence at early stages of AGF evolution. The acquired genes allowed AGF to expand their substrate utilization range, provided new venues for electron disposal, augmented their biosynthetic capabilities, and facilitated their adaptation to anaerobiosis. The majority of donors were anaerobic fermentative bacteria prevalent in the herbivorous gut. In addition, acquisition incidents from marine invertebrates provide interesting clues to the habitat of AGF ancestors prior to terrestrialization. This work strongly indicates that HGT indispensably forged the evolution of AGF as a distinct fungal phylum and provides a unique example of the role of HGT in shaping the evolution of a high rank taxonomic eukaryotic lineage.

41 **Introduction**

42 Horizontal gene transfer (HGT) is defined as the acquisition, integration, and retention of foreign

43 genetic material into a recipient organism (Doolittle 1999). HGT represents a relatively rapid

44 process for trait acquisition; as opposed to gene creation either from preexisting genes (via

45 duplication, fission, fusion, or exon shuffling) or through *de-novo* gene birth from non-coding

46 sequences (Andersson et al 2015, Carvunis et al 2010, Innan and Kondrashov 2010, Cai, 2008,

47 Kaessmann 2010). In prokaryotes, the occurrence, patterns, frequency, and impact of HGT on

48 the genomic architecture (Ochman et al 2000), metabolic abilities (Caro-Quintero and

49 Konstantinidis 2015, Youssef et al 2015), physiological preferences (Omelchenko et al 2005,

50 Puigbo et al 2008), and ecological fitness (Wiedenbeck and Cohan 2011) has been widely

51 investigated, and the process is now regarded as a major driver of genome evolution in bacteria

52 and archaea (Philippe and Douady 2003, Syvanen 2012). Although eukaryotes are perceived to

53 evolve principally through modifying existing genetic information, analysis of HGT events in

54 eukaryotic genomes has been eliciting increasing interest and scrutiny. In spite of additional

55 barriers that need to be overcome in eukaryotes, e.g. crossing the nuclear membrane, germ line

56 sequestration in sexual multicellular eukaryotes, and epigenetic nucleic acids modifications

57 mechanisms (Andersson et al 2015, Fitzpatrick 2012), it is now widely accepted that HGT

58 contributes significantly to eukaryotic genome evolution (Husnik and McCutcheon 2017,

59 Keeling and Palmer 2008). HGT events have convincingly been documented in multiple

60 phylogenetically disparate eukaryotes ranging from the Excavata (Eichinger et al 2005, Hirt et al

61 2002, Nixon et al 2002, Qian and Keeling 2001), SAR supergroup (Eme et al 2017, Kishore et al

62 2013, Ricard et al 2006, Wisecaver et al 2013), Algae (Schönknecht et al 2013b), Plants

63 (Richardson and Palmer 2007), and Opisthokonta (Gladyshev et al 2008, Danchin, 2010 #72,

64 Marcet-Bouben and Gabaldon 2010, Sun et al 2010). Reported HGT frequency in eukaryotic  
65 genomes ranges from a handful of genes, e.g. (McCarthy and Fitzpatrick 2016), to up to 9.6% in  
66 Bdelloid rotifers (Gladyshev et al 2008).

67 The kingdom Fungi represents a phylogenetically coherent clade that evolved  $\approx$  900-1481  
68 Mya from a unicellular flagellated ancestor (Douzery et al 2004, Parfrey et al 2011, Taylor and  
69 Berbee 2006). To date, multiple efforts have been reported on the detection and quantification of  
70 HGT in fungi. A survey of 60 fungal genomes reported HGT frequencies of 0-0.38% (Marcet-  
71 Bouben and Gabaldon 2010), and similar low values were observed in the genomes of five early-  
72 diverging pathogenic Microsporidia and Cryptomycota (Alexander et al 2016b). As such, the  
73 prevailing consensus is that HGT events in fungal genomes are infrequent and sporadic  
74 (Fitzpatrick 2012, Schönknecht et al 2013b). This has been attributed to the osmotrophic lifestyle  
75 of fungi (Berbee et al 2017), which is less conducive to HGT compared to the phagocytic  
76 lifestyle of several microeukaryotes with relatively higher HGT frequency (Doolittle 1998).

77 The anaerobic gut fungi (AGF, Neocallimastigomycota) represent a phylogenetically  
78 distinct basal fungal lineage. The AGF appear to exhibit a restricted distribution pattern, being  
79 encountered in the gut of ruminant and non-ruminant herbivorous (Gruninger et al 2014). In the  
80 herbivorous gut, the life cycle of the AGF (Figure S1) involves the discharge of motile  
81 flagellated zoospores from sporangia in response to animal feeding, the chemotaxis and  
82 attachment of zoospores to ingested plant material, spore encystment, and the subsequent  
83 production of rhizoidal growth that penetrates and digests plant biomass through the production  
84 of a wide array of cellulolytic and lignocellulolytic enzymes.

85 Survival, colonization, and successful propagation of AGF in the herbivorous gut  
86 necessitate the acquisition of multiple unique physiological characteristics and metabolic abilities

87 absent in other fungal lineages. These include, but are not limited to, development of a robust  
88 plant biomass degradation machinery, adaptation to anaerobiosis, and exclusive dependence on  
89 fermentation for energy generation and recycling of electron carriers (Boxma et al 2004, Youssef  
90 et al 2013). Therefore, we hypothesized that sequestration into the herbivorous gut was  
91 conducive to the broad adoption of HGT as a relatively faster adaptive evolutionary strategy for  
92 niche adaptation by the AGF (Figure S1). Further, since no part of the AGF life cycle occurs  
93 outside the animal host and no reservoir of AGF outside the herbivorous gut has been identified  
94 (Gruninger et al 2014), then acquisition would mainly occur from donors that are prevalent in the  
95 herbivorous gut (Figure S1). Apart from earlier observations on the putative bacterial origin of a  
96 few catabolic genes in two AGF isolates (Garcia-Vallvé et al 2000, Harhangi et al 2003), and  
97 preliminary BLAST-based queries of a few genomes (Haitjema et al 2017, Youssef et al 2013),  
98 little is currently known on the patterns, determinants, and frequency of HGT in the  
99 Neocallimastigomycota. To address this hypothesis, we systematically evaluated the patterns of  
100 HGT acquisition in the transcriptomes of 27 AGF strains and 4 AGF genomes broadly covering  
101 the breadth of AGF genus-level diversity. Our results document the high level of HGT in AGF in  
102 contrast to HGT paucity across the fungal kingdom. The identity of genes transferred,  
103 distribution pattern of events across AGF genera, phylogenetic affiliation of donors, and the  
104 expansion of acquired genetic material in AGF genomes highlight the role played by HGT in  
105 forging the evolution and diversification of the Neocallimastigomycota as a phylogenetically,  
106 metabolically, and ecologically distinct lineage in the fungal kingdom.

107

## Materials and Methods

108 **Organisms.** Type strains of the Neocallimastigomycota are unavailable through culture  
109 collections due to their strict anaerobic and fastidious nature, as well as the frequent occurrence  
110 of senescence in AGF strains (Ho and Barr 1995). As such, obtaining a broad representation of  
111 the Neocallimastigomycota necessitated the isolation of representatives of various AGF genera  
112 *de novo*. Samples were obtained from the feces, rumen, or digesta of domesticated and wild  
113 herbivores around the city of Stillwater, OK and Val Verde County, Texas (Table 1). Isolation  
114 procedures are explained in detail in the Supplementary text.

115 **Sequencing and assembly.** Transcriptomic sequencing was conducted for 22 AGF strains.  
116 Sequencing multiple taxa provides stronger evidence for the occurrence of HGT in a target  
117 lineage (Richards and Monier 2017), and allows for the identification of phylum-wide versus  
118 genus- and species-specific HGT events. Transcriptomic, rather than genomic, sequencing was  
119 chosen for AGF-wide HGT identification efforts since enrichment for polyadenylated (poly(A))  
120 transcripts prior to RNA-seq provides an additional safeguard against possible prokaryotic  
121 contamination, an issue that often plagued eukaryotic genome-based HGT detection efforts  
122 (Boothby et al 2015, Koutsovoulos et al 2016), as well as to demonstrate that HGT genes  
123 identified are transcribed in AGF. Protocols for RNA extraction, transcriptomic sequencing and  
124 assembly, and peptide model prediction are described in detail in the supplementary text.

125 **HGT identification.** A combination of BLAST similarity searches, comparative similarity index  
126 (HGT index,  $h_U$ ), phylogenetic analyses, and parametric gene composition approaches were  
127 conducted to identify HGT events in the analyzed transcriptomic datasets (Fig. 1). We define an  
128 HGT event as the acquisition of a foreign gene/pfam by AGF from a single lineage/donor.  
129 Details on the criteria used for identification of HGT events are described in the supplementary

130 text. The GC content, and intron distribution were assessed in all identified events and compared  
131 to averages of an equal number of randomly chosen genes from AGF genomes using Student t-  
132 test to identify possible deviations in such characteristics as often observed with HGT genes  
133 (Soucy et al 2015). As a control, the frequency of HGT occurrence in the genomes of a  
134 filamentous ascomycete (*Colletotrichum graminicola*, GenBank Assembly accession number  
135 GCA\_000149035.1), and a microsporidian (*Encephalitozoon hellem*, GenBank Assembly  
136 accession number GCA\_000277815.3) were determined using our pipeline (Table S1); and the  
137 results were compared to previously published results (Alexander et al 2016a, Jaramillo et al  
138 2015).

139 **Identification of HGT events in carbohydrate active enzymes (CAZymes) transcripts.** In  
140 AGF genomes, carbohydrate active enzymes (CAZymes) are often encoded by large multi-  
141 module genes with multiple adjacent CAZyme or non-CAZyme domains. A single gene can  
142 hence harbor multiple CAZyme pfams of different (fungal or non-fungal) origins (Haitjema et al  
143 2017, Youssef et al 2013). As such, our initial efforts for HGT assessment in CAZyme-encoding  
144 transcripts using an entire gene/ transcript strategy yielded inaccurate results since similarity  
145 searches only identified pfams with the lowest e-value or highest number of copies, while  
146 overlooking additional CAZyme pfams in the transcript (Figure S2). To circumvent the multi-  
147 modular nature of AGF CAZyme transcripts, we opted for the identification of CAZyme HGT  
148 events on trimmed domains, rather than entire transcript. Details on the identification of  
149 CAZyme-containing transcripts and criteria used for detection of CAZyme HGT events are  
150 explained in the supplementary text.

151 **Neocallimastigomycota-specific versus non-specific HGT events.** For all HGT events  
152 identified in the Neocallimastigomycota, orthologues (30% identity, >100 amino acids alignment)

153 were extracted from the genomes of other basal fungi, i.e. members of Blastocladales,  
154 Chytridiomycota, Cryptomycota, Microsporidia, Mucoromycota, and Zoopagomycota, and the  
155 phylogenetic affiliation of these orthologues was assessed. An HGT event was judged to be  
156 Neocallimastigomycota-specific if: 1. orthologues were absent in all basal fungal genomes, 2.  
157 orthologues were identified in basal fungal genomes, but these orthologues were of clear fungal  
158 origin or displayed an affiliation different from that observed in the Neocallimastigomycota. On  
159 the other hand, events were judged to be non-specific to the Neocallimastigomycota if  
160 phylogenetic analysis of basal fungal orthologues indicated a non-fungal origin with a donor  
161 affiliation similar to that observed in the Neocallimastigomycota (Figure 1).

162 **Data accession.** Sequences of individual transcripts identified as horizontally transferred are  
163 deposited in GenBank under the accession number MH043627-MH043936, and MH044722-  
164 MH044724. The whole transcriptome shotgun sequences were deposited in GenBank under the  
165 BioProject [PRJNA489922](https://www.ncbi.nlm.nih.gov/bioproject/PRJNA489922), and Biosample accession numbers SAMN09994575-  
166 SAMN09994596. Transcriptomic assemblies were deposited in the SRA under project accession  
167 number SRP161496. Alignments, as well as Newick tree files for all HGT genes are provided as  
168 a supplementary file (Supp. files 1 and 2). Trees of specific HGT events discussed in the results  
169 and discussion sections are presented in the supplementary document (S5-S56).



170  
171  
172  
173  
174  
175  
176  
177  
178  
179  
180  
181  
182  
183  
184  
185  
186  
187  
188  
189  
190  
191  
192

## Results

**Isolates.** The transcriptomes of 22 different isolates were sequenced. These isolates belonged to six out of the nine currently described AGF genera: *Anaeromyces* (n=5), *Caecomyces* (n=2), *Neocallimastix* (n=2), *Orpinomyces* (n=3), *Pecoromyces* (n=4), *Piromyces* (n=4), as well as the recently proposed genus *Feromyces* (n=2) (Hanafy et al 2018) (Table 1, Supplementary Figure 3). Out of the three AGF genera not included in this analysis, two are currently represented by a single strain that was either lost (genus *Oontomyces* (Dagar et al 2015)), or appears to exhibit an extremely limited geographic and animal host distribution (genus *Buwchfawromyces* (Callaghan et al 2015)). The third unrepresented genus (*Cyllamyces*) has recently been suggested to be phylogenetically synonymous with *Caecomyces* (Wang et al 2017). As such, the current collection is a broad representation of currently described AGF genera.

**Sequencing.** Transcriptomic sequencing yielded 15.2-110.8 million reads (average, 40.87) that were assembled into 31,021-178,809 total transcripts, 17,539-132,141 distinct transcripts (clustering at 95%), and 16,500-70,061 predicted peptides (average 31,611) (Table S2). Assessment of transcriptome coverage using BUSCO (Simão et al 2015) yielded high completion values (82.76-97.24%) for all assemblies (Table S2). For strains with a sequenced genome (*Pecoromyces ruminantium*, *Piromyces finnis*, *Piromyces* sp. E2, *Anaeromyces robustus*, and *Neocallimastix californiae*), genome coverage (percentage of genes in a strain's genome for which a transcript was identified) ranged between 70.9-91.4% (Table S2).

**HGT events.** A total of 327 distinct HGT events were identified in the Neocallimastigomycota pantranscriptome analyzed (Table S3). The average number of events per genus was  $251 \pm 16$  and ranged between 232 in the genus *Caecomyces* to 276 in the genus *Pecoromyces* pantranscriptomes (Fig. 2A). The majority of HGT acquisition events identified (297, 90.83%)

193 appear to be Neocallimastigomycota-specific, i.e. identified only in genomes belonging to the  
194 Neocallimastigomycota, but not in other basal fungal genomes (Table S3), strongly suggesting  
195 that such acquisitions occurred post, or concurrent with, the evolution of Neocallimastigomycota  
196 as a distinct fungal lineage. As well, the majority of these identified genes were  
197 Neocallimastigomycota-wide, being identified in strains belonging to at least six out of the seven  
198 examined genera (220 events, 67.3%), suggesting the acquisition of such genes prior to genus  
199 level diversification within the Neocallimastigomycota. Only 47 events (14.4%) were genus-  
200 specific, with the remainder (60 events, 18.3%) being identified in the transcriptomes of 3-5  
201 genera (Table S3, Figure S4, and Fig. 2b).

202         The absolute majority (89.9%) of events were successfully mapped to at least one of the  
203 four AGF genomes (Table S4), with a fraction (8/33) of the unmapped transcripts being specific  
204 to a genus with no genome representative (*Feromyces*, *Caecomyces*). Compared to a random  
205 subset of 327 genes in each of the sequenced genomes, horizontally transferred genes in AGF  
206 genomes exhibited significantly ( $P < 0.0001$ ) fewer introns ( $1.55 \pm 3.67$  vs  $3.32 \pm 0.83$ ), as well as  
207 higher GC content ( $30.94 \pm 4.6$  vs  $27.7 \pm 5.5$ ) (Table S4). Further, HGT genes/pfams often  
208 displayed high levels of gene/ pfam duplication and expansion within the genome (Table S4),  
209 resulting in an HGT frequency of 2.88% in *Pecoramyces ruminantium* (470 HGT genes out of  
210 16,347 total genes), 3.74% in *Piromyces finnis* (429 HGT genes out of 11,477 total genes),  
211 4.00% in *Anaeromyces robustus* (517 HGT genes out of 12,939 total genes), and 4.13% in  
212 *Neocallimastix californiae* (864 HGT genes out of 20,939 total genes).

213 **Donors.** A bacterial origin was identified for the majority of HGT events (82.6%), with four  
214 bacterial phyla (Firmicutes, Proteobacteria, Bacteroidetes, and Spirochaetes) identified as donors  
215 for 203 events (62.1% of total, 75.2% of bacterial events) (Fig. 3A). Specifically, the

216 contribution of members of the Firmicutes (142 events) was paramount, the majority of which  
217 were most closely affiliated with members of the order Clostridiales (119 events). In addition,  
218 minor contributions from a wide range of bacterial phyla were also identified (Fig. 3A). The  
219 majority of the putative donor taxa are strict/ facultative anaerobes, and many of which are also  
220 known to be major inhabitants of the herbivorous gut and often possess polysaccharide-  
221 degradation capabilities (He et al 2018, Stewart et al 2018). Archaeal contributions to HGT were  
222 extremely rare (5 events). On the other hand, multiple (50) events with eukaryotic donors were  
223 identified. Remarkably, eukaryotic marine lineages, e.g. Cnidaria (stony corals and sea  
224 anemonae), Arthropoda (crustaceans and horse shoe crabs), Mollusca (Oysters and Scallops),  
225 Osteichthyes (bony fish), Brachiopoda, Echinodermata (sea urchins, sea cucumber, and starfish),  
226 Porifera (sponges), and *Trichoplax* (the only extant member of the Placozoa; known to inhabit  
227 marine environments especially on substrates such as stony corals and mollusk shells (Pearse and  
228 Voigt 2007)) contributed 10 out of the 50 eukaryotic HGT events, despite their physical  
229 separation from the current AGF habitat (Table S3, supplementary document). In few instances,  
230 a clear non-fungal origin was identified for a specific event, but the precise inference of the  
231 donor based on phylogenetic analysis was not feasible (Table S3).

232 **Metabolic characterization.** Functional annotation of HGT genes/pfams indicated that the  
233 majority (61.8%) of events encode metabolic functions such as extracellular polysaccharide  
234 degradation and central metabolic processes. Bacterial donors were slightly overrepresented in  
235 metabolic HGT events (88.1% of the metabolism-related events, compared to 82.6% of the total  
236 events). Genes involved in cellular processes and signaling represent the second most  
237 represented HGT events (11%), while genes involved in information storage and processing only

238 made up 6.12% of the HGT events identified (Figs 3b-e). Below we present a detailed  
239 description of the putative abilities and functions enabled by HGT transfer events.  
240 **Central catabolic abilities.** Multiple HGT events encoding various central catabolic processes  
241 were identified in AGF transcriptomes and successfully mapped to the genomes (Fig. 4, Table  
242 S3, Figs S5-S17). A group of events appear to encode enzymes that allow AGF to channel  
243 specific substrates into central metabolic pathways. For example, genes encoding enzymes of the  
244 Leloir pathway for galactose conversion to glucose-1-phosphate (galactose-1-epimerase,  
245 galactokinase (Fig. 5A), galactose-1-phosphate uridylyltransferase, and UDP-glucose-4-  
246 epimerase) were identified, in addition to genes encoding ribokinase, as well as xylose isomerase  
247 and xylulokinase for ribose and xylose channeling into the pentose phosphate pathway. As well,  
248 genes encoding deoxyribose-phosphate aldolase (DeoC) enabling the utilization of purines as  
249 carbon and energy sources were also horizontally acquired in AGF. Further, several of the  
250 glycolysis/gluconeogenesis genes, e.g. phosphoenolpyruvate synthase, as well as  
251 phosphoglycerate mutase were also of bacterial origin. Fungal homologues of these  
252 glycolysis/gluconeogenesis genes were not identified in the AGF transcriptomes, suggesting the  
253 occurrence of xenologous replacement HGT events.

254 In addition to broadening substrate range, HGT acquisitions provided additional venues  
255 for recycling reduced electron carriers via new fermentative pathways in this strictly anaerobic  
256 and fermentative lineage. The production of ethanol, D-lactate, and hydrogen appears to be  
257 enabled by HGT (Fig. 4). The acquisition of several aldehyde/alcohol dehydrogenases, and of D-  
258 Lactate dehydrogenase for ethanol and lactate production from pyruvate was identified.  
259 Although these two enzymes are encoded in other fungi as part of their fermentative capacity  
260 (e.g. *Saccharomyces* and *Schizosaccharomyces*), no homologues of these fungal genes were

261 identified in AGF pantranscriptomes. Hydrogen production in AGF, as well as in many  
262 anaerobic eukaryotes with mitochondria-related organelles, involves pyruvate decarboxylation to  
263 acetyl CoA, followed by the use of electrons generated for hydrogen formation via an anaerobic  
264 Fe-Fe hydrogenase. In AGF, while pyruvate decarboxylation to acetyl CoA via pyruvate-formate  
265 lyase and the subsequent production of acetate via acetyl-CoA:succinyl transferase appear to be  
266 of fungal origin, the Fe-Fe hydrogenase and its entire maturation machinery (HydEFG) seem to  
267 be horizontally transferred being phylogenetically affiliated with similar enzymes in  
268 Thermotogae, Clostridiales, and the anaerobic jakobid excavate, *Stygiella incarcerate* (Fig. 5B).  
269 It has recently been suggested that *Stygiella* acquired the Fe-Fe hydrogenase and its maturation  
270 machinery from bacterial donors including Thermotogae, Firmicutes, and Spirochaetes (Leger et  
271 al 2016), suggesting either a single early acquisition event in eukaryotes, or alternatively  
272 independent events for the same group of gene have occurred in different eukaryotes.

273 **Anabolic capabilities.** Multiple anabolic genes that expanded AGF biosynthetic capacities  
274 appear to be horizontally transferred (Fig. S18-S31). These include several amino acid  
275 biosynthesis genes e.g. cysteine biosynthesis from serine; glycine and threonine interconversion;  
276 and asparagine synthesis from aspartate. In addition, horizontal gene transfer allowed AGF to de-  
277 novo synthesize NAD via the bacterial pathway (starting from aspartate via L-aspartate oxidase  
278 (NadB; Fig. 5C) and quinolinate synthase (NadA) rather than the five-enzymes fungal pathway  
279 starting from tryptophan (Lin et al 2010)). HGT also allowed AGF to salvage thiamine via the  
280 acquisition of phosphomethylpyrimidine kinase. Additionally, several genes encoding enzymes  
281 in purine and pyrimidine biosynthesis were horizontally transferred (Fig. 4). Finally, horizontal  
282 gene transfer allowed AGF to synthesize phosphatidyl-serine from CDP-diacylglycerol, and to  
283 convert phosphatidyl-ethanolamine to phosphatidyl-choline.

284 ***Adaptation to the host environment.*** Horizontal gene transfer also appears to have provided  
285 means of guarding against toxic levels of compounds known to occur in the host animal gut (Fig.  
286 S32-S38). For example, methylglyoxal, a reactive electrophilic species (Lee and Park 2017), is  
287 inevitably produced by ruminal bacteria from dihydroxyacetone phosphate when experiencing  
288 growth conditions with excess sugar and limiting nitrogen (Russell 1993). Genes encoding  
289 enzymes mediating methylglyoxal conversion to D-lactate (glyoxalase I and glyoxalase II-  
290 encoding genes) appear to be acquired via HGT in AGF. Further, HGT allowed several means of  
291 adaptation to anaerobiosis. These include: 1) acquisition of the oxygen-sensitive ribonucleoside-  
292 triphosphate reductase class III (Fig. 5D) that is known to only function during anaerobiosis to  
293 convert ribonucleotides to deoxyribonucleotides (Jordan and Reichard 1998), 2) acquisition of  
294 squalene-hopene cyclase, which catalyzes the cyclization of squalene into hopene, an essential  
295 step in biosynthesis of the cell membrane steroid tetrahymanol that replaced the molecular O<sub>2</sub>-  
296 requiring ergosterol in the cell membranes of AGF, 3) acquisition of several enzymes in the  
297 oxidative stress machinery including Fe/Mn superoxide dismutase, glutathione peroxidase,  
298 rubredoxin/rubrerythrin, and alkylhydroperoxidase.

299 In addition to anaerobiosis, multiple horizontally transferred general stress and repair  
300 enzymes were identified (Fig S39-S46). HGT-acquired genes encoding 2-phosphoglycolate  
301 phosphatase, known to metabolize the 2-phosphoglycolate produced in the repair of DNA lesions  
302 induced by oxidative stress (Pellicer et al 2003) to glycolate, were identified in all AGF  
303 transcriptomes studied (Fig. 4, Table S3). Surprisingly, two genes encoding antibiotic resistance  
304 enzymes, chloramphenicol acetyltransferase and aminoglycoside phosphotransferase, were  
305 identified in all AGF transcriptomes, presumably to improve its fitness in the eutrophic rumen  
306 habitat that harbors antibiotic-producing prokaryotes (Table S3). While unusual for eukaryotes to

307 express antibiotic resistance genes, basal fungi such as *Allomyces*, *Batrachochytrium*, and  
308 *Blastocladiella* were shown to be susceptible to chloramphenicol and streptomycin (Bishop et al  
309 2009, Rooke and Shattock 1983). Other horizontally transferred repair enzymes include DNA-3-  
310 methyladenine glycosylase I, methylated-DNA--protein-cysteine methyltransferase, galactoside  
311 and maltose O-acetyltransferase, and methionine-R-sulfoxide reductase (Table S3).

312 **HGT transfer in AGF carbohydrate active enzymes machinery.** Within the analyzed AGF  
313 transcriptomes, CAZymes belonging to 39 glycoside hydrolase (GHs), 5 polysaccharide lyase  
314 (PLs), and 10 carbohydrate esterase (CEs) families were identified (Fig. 6). The composition of  
315 the CAZymes of various AGF strains examined were broadly similar, with the following ten  
316 notable exceptions: Presence of GH24 and GH78 transcripts only in *Anaeromyces* and  
317 *Orpinomyces*, the presence of GH28 transcripts only in *Pecoromyces*, *Neocallimastix*, and  
318 *Orpinomyces*, the presence of GH30 transcripts only in *Anaeromyces*, and *Neocallimastix*, the  
319 presence of GH36 and GH95 transcripts only in *Anaeromyces*, *Neocallimastix*, and  
320 *Orpinomyces*, the presence of GH97 transcripts only in *Neocallimastix*, and *Feromyces*, the  
321 presence of GH108 transcripts only in *Neocallimastix*, and *Piromyces*, and the presence of GH37  
322 predominantly in *Neocallimastix*, GH57 transcripts predominantly in *Orpinomyces*, GH76  
323 transcripts predominantly in *Feromyces*, and CE7 transcripts predominantly in *Anaeromyces*  
324 (Fig. 6).

325 HGT appears to be rampant in the AGF pan-CAZyome: A total of 90 events (27.5% of total  
326 HGT events) were identified, with the majority occurring in all AGF genera examined (Fig. 6,  
327 Table S3). In 48% of GH families, 55% of CE families, and 20% of PL families, a single event  
328 (i.e. attributed to one donor) was observed (Fig. 6, Table S3).

329 Duplication of these events in AGF genomes was notable, with 152, 373, 201, and 191 copies of

330 HGT CAZyme pfams identified in *Anaeromyces*, *Neocallimastix*, *Piromyces* and *Pecoramyces*  
331 genomes, representing 40.7%, 45.3%, 52.9%, and 41.2% of the overall organismal CAZyme  
332 machinery (Table S4). The contribution of Viridiplantae, Flavobacteriales, Fibrobacteres, and  
333 Gamma-Proteobacteria was either exclusive to CAZyme-related HGT events or significantly  
334 higher in CAZyme, compared to other, events (Fig. 3A).

335 Transcripts acquired by HGT represented >50% of transcripts in anywhere between 13  
336 (*Caecomyces*) to 20 (*Anaeromyces*) GH families; 3 (*Caecomyces*) to 5 (*Anaeromyces*,  
337 *Neocallimastix*, *Orpinomyces*, and *Feramyces*) CE families; and 2 (*Caecomyces* and *Feramyces*)  
338 to 3 (*Anaeromyces*, *Pecoramyces*, *Piromyces*, *Neocallimastix*, and *Orpinomyces*) PL families  
339 (Fig. 6). It is important to note that in all these families, multiple transcripts appeared to be of  
340 bacterial origin based on BLAST similarity search but did not meet the strict criteria of  $h_U > 30$ ,  
341 and so were deemed not horizontally transferred. As such, the contribution of HGT transcripts to  
342 overall transcripts in these families is probably an underestimate. Only GH9, GH20, GH37,  
343 GH45, and PL3 families appear to lack any detectable HGT events. A PCA biplot comparing  
344 CAZyme in AGF genomes to other basal fungal lineages strongly suggests that the acquisition  
345 and expansion of many of these foreign genes play an important role in shaping the  
346 lignocellulolytic machinery of AGF (Fig. 7). The majority of CAZyme families defining AGF  
347 CAZyme were predominantly of non-fungal origin (Fig. 7). This pattern clearly attests to the  
348 value of HGT in shaping AGF CAZyme via acquisition and extensive duplication of acquired  
349 gene families.

350 Collectively, HGT had a profound impact on AGF plant biomass degradation capabilities. The  
351 AGF CAZyme encodes enzymes putatively mediating the degradation of twelve different  
352 polysaccharides (Fig. S57). In all instances, GH and PL families with >50% horizontally



353 transferred transcripts contributed to backbone cleavage of these polymers; although in many  
354 polymers, e.g. cellulose, glucoarabinoxylan, and rhamnogalactouronan, multiple different GHs  
355 can contribute to backbone cleavage. Similarly, GH, CE, and PL families with >50%  
356 horizontally transferred transcripts contributed to 10 out of 13 side-chain-cleaving activities, and  
357 3 out of 5 oligomer-to-monomer breakdown activities (Fig. S57).

358  
359  
360  
361  
362  
363  
364  
365  
366  
367  
368  
369  
370  
371  
372  
373  
374  
375  
376  
377  
378  
379  
380

## Discussion

Here, we present a systematic analysis of HGT patterns in 27 transcriptomes and 4 genomes belonging to the Neocallimastigomycota. Our analysis identified 327 events, representing 2.9-4.1% of genes in examined AGF genomes. Further, we consider these values to be conservative estimates due to the highly stringent criteria employed. Only events with  $h_U$  of  $>30$  were considered, and all putative events were further subjected to manual inspection and phylogenetic tree construction to confirm incongruence with organismal evolution and bootstrap-supported affiliation to donor lineages. Further, events identified in less than 50% of strains in a specific genus were excluded, and parametric gene composition approaches were implemented in conjunction with sequence-based analysis. Nevertheless, the observed HGT frequency in this study is in contrast to the reported paucity in HGT events across the fungal kingdom (Alexander et al 2016b, Marcet-Bouben and Gabaldon 2010), and hence the Neocallimastigomycota represent a notable exception within the Mycota. Multiple factors could be postulated to account for the observed high HGT frequency in AGF. The sequestration of AGF into the anaerobic, prokaryotes-dominated herbivorous gut necessitated the implementation of the relatively faster adaptive mechanisms for survival in this new environment, as opposed to the slower strategies of neofunctionalization and gene birth. Indeed, niche adaptation and habitat diversification events are widely considered important drivers for HGT in eukaryotes (de Koning et al 2000, Keeling and Palmer 2008, Ricard et al 2006, Schönknecht et al 2013a). Further, AGF are constantly exposed to a rich milieu of cells and degraded DNA in the herbivorous gut. Such close physical proximity between donors/ extracellular DNA and recipients is also known to greatly facilitate HGT (Beiko et al 2005, Moliner et al 2010, Shterzer and Mizrahi 2015). Finally, AGF release asexual motile free zoospores into the herbivorous gut as part of their life cycle (Gruninger et al

381 2014). According to the weak-link model (Huang 2013), these weakly protected and exposed  
382 structures provide excellent entry point of foreign DNA to eukaryotic genomes. It is important to  
383 note that AGF zoospores also appear to be naturally competent, capable of readily uptaking  
384 nucleic acids from their surrounding environment (Calkins et al 2016).

385 The distribution of HGT events across various AGF taxa (Fig. 2), identities of HGT  
386 donors (Fig. 3), and abilities imparted (Figs. 4-5) could offer important clues regarding the  
387 timing and impact of HGT on Neocallimastigomycota evolution. The majority of events (67.3%)  
388 were Neocallimastigomycota-wide and were mostly acquired from lineages known to inhabit the  
389 herbivorous gut, e.g. Firmicutes, Proteobacteria, Bacteroidetes, and Spirochaetes (Figs. 2-3).  
390 This pattern strongly suggests that such acquisitions occurred post (or concurrent with) AGF  
391 sequestration into the herbivorous gut, but prior to AGF genus level diversification. Many of the  
392 functions encoded by these events represented novel functional acquisitions that impart new  
393 abilities, e.g. galactose metabolism, methyl glyoxal detoxification, pyruvate fermentation to d-  
394 lactate and ethanol, and chloramphenicol resistance (Fig. 3). Others represented acquisition of  
395 novel genes or pfams augmenting existing capabilities within the AGF genomes, e.g. acquisition  
396 of GH5 cellulases to augment the fungal GH45, acquisition of additional GH1 and GH3 beta  
397 gluco- and galactosidases to augment similar enzymes of apparent fungal origin in AGF  
398 genomes (Fig. 6-7, Fig. S47). Novel functional acquisition events enabled AGF to survive and  
399 colonize the herbivorous gut by: 1. Expanding substrate-degradation capabilities (Fig. 5a, 6, 7,  
400 S5-S17, Table S3), hence improving fitness by maximizing carbon and energy acquisition from  
401 available plant substrates, 2. Providing additional venues for electron disposal via lactate,  
402 ethanol, and hydrogen production, and 3. Enabling adaptation to anaerobiosis (Fig. 4, S32-S38,  
403 Table S3).

404           A smaller number of observed events (n=47) were genus-specific (Fig. 2, Table S3). This  
405 group was characterized by being significantly enriched in CAZymes (53.2% of genus-specific  
406 horizontally transferred events have a predicted CAZyme function, as opposed to 27.5% in the  
407 overall HGT dataset), and being almost exclusively acquired from donors that are known to  
408 inhabit the herbivorous gut (Creevey et al 2014) (35 out of the 47 events were acquired from the  
409 orders Clostridiales, Bacillales, Lactobacillales and Negativicutes within Firmicutes,  
410 Burkholderiales, and Vibrionales within the Beta- and Gamma-Proteobacteria, Flavobacteriales  
411 and Bacteroidales within Bacteroidetes, and the Spirochaetes, Actinobacteria, and  
412 Lentisphaerae), or from Viridiplantae (5 out of the 47 events). Such pattern suggests the  
413 occurrence of these events relatively recently, in the herbivorous gut post AGF genus level  
414 diversification. We reason that the lower frequency of such events is a reflection of the relaxed  
415 pressure for acquisition and retention of foreign genes at this stage of AGF evolution.

416           Finally, few Neocallimastigomycota-wide HGT events were characterized by donors  
417 that are not typically encountered in the herbivorous gut (Comtet-Marre et al 2017, Creevey et al  
418 2014, Neves et al 2017, Qi et al 2011, Ricard et al 2006, Romero-Pérez et al 2011, Tapio et al  
419 2016). Remarkably, many of these donors are marine inhabitants (Table S3, Fig. 3, Fig. S47-  
420 S56). In general, these HGT events of marine origin were Neocallimastigomycota-wide  
421 (identified in 5-7 genera), and encoded functions that are beneficial for survival in a wide range  
422 of habitats (e.g. DNA repair, motility, and signal transduction, with only one metabolism-related  
423 event). We reason that this observation could offer interesting clues regarding the pre-gut  
424 sequestration ancestor of AGF. The presence of such genes could be a marker of an ancient  
425 symbiotic relationship between AGF ancestors and marine eukaryotes prior to fungal  
426 terrestrialization. The marine ancestral origin of the kingdom Fungi is currently undisputed

427 (Berbee et al 2017), but the nature and mechanism of the process, e.g. single ancestral  
428 terrestrialization followed by diversification, or multiple independent events of terrestrialization,  
429 is still unclear. It is notable that the majority (80%) of these HGT events were  
430 Neocallimastigomycota-specific, reflecting either a unique symbiotic relationship between AGF  
431 ancestors and these marine hosts or their loss in all other currently known basal fungal lineages.

432 Gene acquisition by HGT necessitates physical contact between donor and recipient  
433 organisms. Many of the HGT acquired traits by AGF are acquired from prokaryotes that are  
434 prevalent in the herbivorous gut microbiota (Fig. 3). However, since many of these traits are  
435 absolutely necessary for survival in the gut, the establishment of AGF ancestors in this  
436 seemingly inhospitable habitat is, theoretically, unfeasible. This dilemma is common to all HGT  
437 processes enabling niche adaptation and habitat diversification (Eme et al 2017). We put forth  
438 two evolutionary scenarios that could explain this dilemma not only for AGF, but also for other  
439 gut-dwelling anaerobic microeukaryotes, e.g. *Giardia*, *Blastocystis*, and *Entamoeba*, where HGT  
440 was shown to play a vital role in enabling survival in anaerobic conditions (Andersson et al  
441 2003, Eme et al 2017, Grant and Katz 2014). The first is a coevolution scenario in which the  
442 progressive evolution of the mammalian gut from a short and predominantly aerobic structure  
443 characteristic of carnivores/insectivores to the longer, more complex, and compartmentalized  
444 structure encountered in herbivores was associated with a parallel progressive and stepwise  
445 acquisition of genes required for plant polymers metabolism and anaerobiosis by AGF ancestors,  
446 hence assuring its survival and establishment in the current herbivorous gut. The second  
447 possibility is that AGF ancestors were indeed acquired into a complex and anaerobic herbivorous  
448 gut, but initially represented an extremely minor component of the gut microbiome and survived  
449 in locations with relatively higher oxygen concentration in the alimentary tract e.g. mouth,

450 saliva, esophagus or in micro-niches in the rumen where transient oxygen exposure occurs.

451 Subsequently, HGT acquisition has enabled the expansion of their niche, improved their

452 competitiveness and their relative abundance in the herbivorous gut to the current levels.

453 In conclusion, our survey of HGT in AGF acquisition demonstrates that the process is

454 absolutely crucial for the survival and growth of AGF in its unique habitat. This is not only

455 reflected in the large number of events, massive duplication of acquired genes, and overall high

456 HGT frequency observed in AGF genomes, but also in the nature of abilities imparted by the

457 process. HGT events not only facilitated AGF adaptation to anaerobiosis, but also allowed them

458 to drastically improve their polysaccharide degradation capacities, provide new venues for

459 electron disposal via fermentation, and acquire new biosynthetic abilities. As such, we reason

460 that the process should not merely be regarded as a conduit for supplemental acquisition of few

461 additional beneficial traits. Rather, we posit that HGT enabled AGF to forge a new evolutionary

462 trajectory, resulting in Neocallimastigomycota sequestration, evolution as a distinct fungal

463 lineage in the fungal tree of life, and subsequent genus and species level diversification. This

464 provides an excellent example of the role of HGT in forging the formation of high rank

465 taxonomic lineages during eukaryotic evolution.

466 **Conflict of Interest.** The authors declare no conflict of interest.

467 **Acknowledgments.** This work has been funded by the NSF-DEB Grant numbers 1557102 to

468 N.Y. and M.E. and 1557110 to J.E.S.

469 **References:**

470 Alexander WG, Wisecaver JH, Rokas A, Hittinger CT (2016). Horizontally acquired gene in early-  
471 diverging pathogenic fungi enable the use of host nucleosides and nucleotides. *Proc Nat Acad*  
472 *Sci USA* **113**: 4116-4121.

473

474 Andersson DI, Jerlström-Hultqvist J, Näsval J (2015). Evolution of new functions de novo and  
475 from preexisting genes. *Cold Spring Harb Perspect Biol* **7**: a017996.

476

477 Andersson JO, Sjögren AM, Davis LA, Embley TM, Roger AJ (2003). Phylogenetic analyses of  
478 diplomonad genes reveal frequent lateral gene transfers affecting eukaryotes. *Curr Biol* **13**: 94-  
479 104.

480

481 Beiko RG, Harlow TJ, Ragan MA (2005). Highways of gene sharing in prokaryotes. *Proc Nat*  
482 *Acad Sci USA* **102**: 14332-14337.

483

484 Berbee ML, James TY, Strullu-Derrien C (2017). Early Diverging Fungi: Diversity and Impact  
485 at the Dawn of Terrestrial Life. *Annu Rev Microbiol* **71**: 41-60.

486

487 Bishop PJ, Speare R, Poulter R, Butler M, Speare BJ, Hyatt A *et al* (2009). Elimination of the  
488 amphibian chytrid fungus *Batrachochytrium dendrobatidis* by Archey's frog *Leiopelma archeyi*.  
489 *Dis Aquatic Organ* **84**: 9-15.

490

491 Boothby TC, Tenlen JR, Smith FW, Wang JR, Patanella KA, Nishimura EO *et al* (2015).  
492 Evidence for extensive horizontal gene transfer from the draft genome of a tardigrade. *Proc Nat*  
493 *Acad Sci USA* **112**: 15976-15981.  
494  
495 Boxma B, Voncken F, Jannink S, Alen TV, Akhmanova A, Weelden SWHV *et al* (2004). The  
496 anaerobic chytridiomycete fungus *Piromyces* sp. E2 produces ethanol via pyruvate:formate lyase  
497 and an alcohol dehydrogenase *E. Mol Microbiol* **51**: 1389 -1399.  
498  
499 Calkins S, Elledge NC, Hanafy RA, Elshahed MS, Youssef NH (2016). A fast and reliable  
500 procedure for spore collection from anaerobic fungi: Application for RNA uptake and long-term  
501 storage of isolates. *J Microbiol Methods* **127**: 206-213.  
502  
503 Callaghan TM, Podmirseg SM, Hohlweck D, Edwards JE, Puniya AK, Dagar SS *et al* (2015).  
504 *Buwchfawromyces eastonii* gen. nov., sp. nov.: a new anaerobic fungus (Neocallimastigomycota)  
505 isolated from buffalo faeces. *Myckeys* **9**: 11-28.  
506  
507 Caro-Quintero A, Konstantinidis K (2015). Inter-phylum HGT has shaped the metabolism of  
508 many mesophilic and anaerobic bacteria. *ISME J* **9**: 958-967.  
509  
510 Carvunis AR, Rolland T, Wapinski I, Calderwood MA, Yildirim MA, Simonis N *et al* (2010).  
511 Proto-genes and de novo gene birth. *Nature* **487**: 370-374.  
512



513 Comtet-Marre S, Parisot N, Lepercq P, Chaucheyras-Durand F, Mosoni P, Peyretaillade E *et al*  
514 (2017). Metatranscriptomics Reveals the Active Bacterial and Eukaryotic Fibrolytic  
515 Communities in the Rumen of Dairy Cow Fed a Mixed Diet. *Front Microbiol* **8**: 67.  
516  
517 Creevey CJ, Kelly WJ, Henderson G, Leahy SC (2014). Determining the culturability of the  
518 rumen bacterial microbiome. *Microb. Biotechnol.* **7**: 467-479.  
519  
520 Dagar SS, Kumar S, Griffith GW, Edwards JE, Callaghan TM, Singh R *et al* (2015). A new  
521 anaerobic fungus (*Oontomyces anksri* gen. nov., sp. nov.) from the digestive tract of the Indian  
522 camel (*Camelus dromedarius*). *Fungal Biol* **19**: 731-737.  
523  
524 de Koning AP, Brinkman FS, Jones SJ, Keeling PJ (2000). Lateral gene transfer and metabolic  
525 adaptation in the human parasite *Trichomonas vaginalis*. *Mol Biol Evol* **17**: 1769-1773.  
526  
527 Doolittle WF (1998). You are what you eat: a gene transfer ratchet could account for bacterial  
528 genes in eukaryotic nuclear genomes. *Trends Genet* **14**: 307–311.  
529  
530 Doolittle WF (1999). Lateral Genomics. *Trends Cell Biol* **9**: M5-M8.  
531  
532 Douzery EJP, Snell EA, Bapteste E, Delsuc F, Philippe H (2004). The timing of eukaryotic  
533 evolution: Does a relaxed molecular clock reconcile proteins and fossils? *Proc Nat Acad Sci USA*,  
534 **101**: 15386-15391.  
535

536 Eichinger L, Pachebat JA, Glockner G, Rajandream MA, al. e (2005). The genome of the social  
537 amoeba *Dictyostelium discoideum*. *Nature* **435**: 43-57.

538

539 Eme L, Gentekaki E, Curtis B, Archibald J, Roger AJ (2017). Lateral gene transfer in the  
540 adaptation of the anaerobic parasite *Blastocystis* to the gut. *Curr Biol* **27**: 807–820

541

542 Fitzpatrick DA (2012). Horizontal gene transfer in fungi. *FEMS Microbiol Lett* **2011**: 1-8.

543

544 Garcia-Vallvé S, Romeu A, Palau J (2000). Horizontal gene transfer of glycosyl hydrolases of  
545 the rumen Fungi. *Mol Biol Evol* **17**: 352-361.

546

547 Gladyshev EA, Meselson M, Arkhipova IR (2008). Massive horizontal gene transfer in bdelloid  
548 rotifers. *Science* **320**: 1210-1213.

549

550 Grant JR, Katz LA (2014). Phylogenomic study indicates widespread lateral gene transfer in  
551 Entamoeba and suggests a past intimate relationship with parabasalids. *Genome Biol Evol* **6**:  
552 2350-2360.

553

554 Gruninger RJ, Puniyab AK, Callaghanc TM, Edwardsc JE, Youssef N, Dagare SS *et al* (2014).  
555 Anaerobic Fungi (Phylum Neocallimastigomycota): Advances in understanding of their  
556 taxonomy, life cycle, ecology, role, and biotechnological potential. *FEMS Microbiol Ecol* **90**: 1-  
557 17.

558

559 Haitjema CH, Gilmore SP, Henske JK, Solomon KV, Groot Rd, Kuo A *et al* (2017). A parts list  
560 for fungal cellulosomes revealed by comparative genomics. *Nature Microbiol* **2**: 17087.  
561  
562 Hanafy RA, Elshahed MS, Youssef NH (2018). *Feramyces austinii*, gen. nov, sp. nov., an  
563 anaerobic gut fungus from rumen and fecal samples of wild Barbary sheep and fallow deer **110**:  
564 513-525  
565  
566 Harhangi HR, Akhmanova AS, Emmens R, Drift Cvd, Laat WTAMd, Dijken Jpv *et al* (2003).  
567 Xylose metabolism in the anaerobic fungus *Piromyces* sp. strain E2 follows the bacterial  
568 pathway. *Arch Microbiol* **180**: 134-142.  
569  
570 He J, Yi L, Hai L, Ming L, Gao W, Ji R (2018). Characterizing the bacterial microbiota in  
571 different gastrointestinal tract segments of the Bactrian camel. *Sci Rep* **8**: 654.  
572  
573 Hirt RP, Harriman N, Kajava AV, Embley TM (2002). A novel potential surface protein in  
574 *Trichomonas vaginalis* contains a leucine-rich repeat shared by micro-organisms  
575 from all three domains of life. *Mol Biochem Parasitol* **125**: 195–199.  
576  
577 Ho YW, Barr DJS (1995). Classification of anaerobic gut fungi from herbivores with emphasis  
578 on rumen fungi from malaysia. *Mycologia* **87**: 655-677.  
579  
580 Huang JL (2013). Horizontal gene transfer in eukaryotes: the weak-link model. *Bioassays* **35**:  
581 868-875.

582

583 Husnik F, McCutcheon JP (2017). Functional horizontal gene transfer from bacteria to  
584 eukaryotes. *Nat Rev Microbiol* **16**: 67-79.

585

586 Innan H, Kondrashov F (2010). The evolution of gene duplications: classifying and  
587 distinguishing between models. *Nat Rev Genet* **11**: 97-10.

588

589 Jaramillo VDA, Sukno SA, Thon MR (2015). Identification of horizontally transferred genes in  
590 the genus *Colletotrichum* reveals a steady tempo of bacterial to fungal gene transfer. *BMC*  
591 *Genomics* **16**: 2.

592

593 Jordan A, Reichard P (1998). Ribonucleotide Reductases. *Annu Rev Biochem* **67**: 71-98.

594

595 Kaessmann H (2010). Origins, evolution, and phenotypic impact of new genes<sup>2</sup>. *Genome Res* **20**:  
596 1313-1326.

597

598 Kanehisa M, Goto S, Sato Y, Furumichi M, Tanabe M (2012). KEGG for integration and  
599 interpretation of large-scale molecular data sets. *Nucleic Acids Res.* **40**: D109-114.

600

601 Keeling PJ, Palmer JD (2008). Horizontal gene transfer in eukaryotic evolution. *Nat Rev Genet* **9**:  
602 605-618.

603

604 Kishore SP, Stiller JW, Deitsch KW (2013). Horizontal gene transfer of epigenetic machinery  
605 and evolution of parasitism in the malaria parasite *Plasmodium falciparum* and other  
606 apicomplexans. *BMC Evol Biol* **13**: 37.

607

608 Koutsovoulos G, Kumar S, Laetsch DR, Stevens L, Daub J, Conlon C *et al* (2016). No evidence  
609 for extensive horizontal gene transfer in the genome of the tardigrade *Hypsibius dujardini*. *Proc*  
610 *Nat Acad Sci USA* **113**: 5053-5058.

611

612 Lee C, Park C (2017). Bacterial Responses to Glyoxal and Methylglyoxal: Reactive Electrophilic  
613 Species. *Int J Mol Sci* **18**: 169.

614

615 Leger MM, Eme L, Hug LA, Roger AJ (2016). Novel Hydrogenosomes in the Microaerophilic  
616 Jakobid *Stygiella incarcerata*. *Mol Biol Evol* **33**: 2318-2336.

617

618 Lin H, Kwan AL, Dutcher SK (2010). Synthesizing and Salvaging NAD<sup>+</sup>: Lessons Learned  
619 from *Chlamydomonas reinhardtii*. *PLOS Genet* **6**: e1001105.

620

621 Marcet-Bouben M, Gabaldon T (2010). Acquisition of prokaryotic genes by fungal genomes.  
622 *Trends Genet* **26**: 5-8.

623

624 Marchler-Bauer A, Bo Y, Han L, He J, Lanczycki CJ, Lu S *et al* (2017). CDD/SPARCLE:  
625 functional classification of proteins via subfamily domain architectures. *Nucleic acids research*  
626 **45**: D200-D203.

627

628 McCarthy CGP, Fitzpatrick DA (2016). Systematic Search for Evidence of Interdomain  
629 Horizontal Gene Transfer from Prokaryotes to Oomycete Lineages. *mSphere* **1**: e00195-00116.

630

631 Moliner C, Fournier PE, Raoult D (2010). Genome analysis of microorganisms living in  
632 amoebae reveals a melting pot of evolution *FEMS Microbiol Rev* **34**: 281-294

633

634 Neves ALA, Li F, Ghoshal B, McAllister T, Guan LL (2017). Enhancing the Resolution of  
635 Rumen Microbial Classification from Metatranscriptomic Data Using Kraken and Mothur. *Front*  
636 *Microbiol* **8**: 2445.

637

638 Nguyen L-T, Schmidt HA, von Haeseler A, Minh BQ (2015). IQ-TREE: A Fast and Effective  
639 Stochastic Algorithm for Estimating Maximum-Likelihood Phylogenies. *Mol Biol Evol* **32**: 268-  
640 274.

641

642 Nixon JEJ, Wang A, Field J, Morrison HG, McArthur AG, Sogin ML *et al* (2002). Evidence for  
643 lateral transfer of genes encoding ferredoxins, nitroreductases, NADH oxidase,  
644 and alcohol dehydrogenase 3 from anaerobic prokaryotes to *Giardia lamblia* and *Entamoeba*  
645 *histolytica*. *Eukaryot Cell* **1**: 181–190.

646

647 Ochman H, Lawrence JG, Groisman EA (2000). Lateral gene transfer and the nature of bacterial  
648 innovation. *Nature* **405**: 299-304.

649

- 650 Omelchenko MV, Wolf YI, Gaidamakova EK, Matrosova VY, Vasilenko A, Zhai M *et al* (2005).  
651 Comparative genomics of *Thermus thermophilus* and *Deinococcus radiodurans*: divergent routes  
652 of adaptation to thermophily and radiation resistance *BMC Evol Biol* **5**: 57.  
653
- 654 Parfrey LW, Lahr DJG, Knoll AH, Katz LA (2011). Estimating the timing of early eukaryotic  
655 diversification with multigene molecular clocks *Proc Nat Acad Sci USA* **108**: 13624- 13629.  
656
- 657 Pearse VB, Voigt O (2007). Field biology of placozoans (Trichoplax): distribution, diversity,  
658 biotic interactions. *Integr Comp Biol* **47**: 677-692.  
659
- 660 Pellicer MT, Nuñez MF, Aguilar J, Badia J, Baldoma L (2003). Role of 2-Phosphoglycolate  
661 Phosphatase of *Escherichia coli* in Metabolism of the 2-Phosphoglycolate Formed in DNA  
662 Repair. *J Bacteriol* **185**: 5815-5821.  
663
- 664 Philippe H, Douady CJ (2003). Horizontal gene transfer and phylogenetics. *Curr Opin Microbiol*  
665 **6**: 498-505.  
666
- 667 Puigbo P, Pasamontes A, Garcia-Vallve S (2008). Gaining and losing the thermophilic  
668 adaptation in prokaryotes. *Trends Genet* **24**: 10-14.  
669
- 670 Qi M, Wang P, O'Toole N, Barboza PS, Ungerfeld E, Leigh MB *et al* (2011). Snapshot of the  
671 Eukaryotic Gene Expression in Muskoxen Rumen-A Metatranscriptomic Approach. *PloS one* **6**:  
672 e20521.

673

674 Qian Q, Keeling PJ (2001). Diplonemid glyceraldehyde-3-phosphate dehydrogenase (GAPDH)  
675 and prokaryote to-eukaryote lateral gene transfer. *Protist* **152**: 193–201.

676

677 Ricard G, McEwan NR, Dutilh BE, Jouany J-P, Macheboeuf D, Mitsumori M *et al* (2006).  
678 Horizontal gene transfer from Bacteria to rumen Ciliates indicates adaptation to their anaerobic,  
679 carbohydrates-rich environment. *BMC Genomics* **7**: 22.

680

681 Richards TA, Monier A (2017). A tale of two tradigrades. *Proc Nat Acad Sci USA* **113**: 4892-  
682 4894.

683

684 Richardson AO, Palmer JD (2007). Horizontal gene transfer in plants. *J Exp Bot* **58**: 1-9.

685

686 Romero-Pérez GA, Ominski KH, McAllister TA, Krause DO (2011). Effect of Environmental  
687 Factors and Influence of Rumen and Hindgut Biogeography on Bacterial Communities in Steers.  
688 *Appl Environ Microbiol* **77**: 258-268.

689

690 Rooke DM, Shattock RC (1983). Effect of Chloramphenicol and Streptomycin on  
691 Developmental Stages of *Phytophthom infestans*. *Microbiol* **129**: 3401-3410.

692

693 Russell JB (1993). Glucose toxicity in *Prevotella ruminicola*: methylglyoxal accumulation and its  
694 effect on membrane physiology. *Appl Environ Microbiol* **59**: 2844-2850.

695



696 Schönknecht G, Chen WH, Ternes CM, Barbier GG, Shrestha RP, Stanke M *et al* (2013a). Gene  
697 transfer from bacteria and archaea facilitated evolution of an extremophilic eukaryote. *Science*  
698 **339**: 1207-1210.

699

700 Schönknecht G, Weber AP, Lercher MJ (2013b). Horizontal gene acquisitions by eukaryotes as  
701 drivers of adaptive evolution. *Bioassays* **36**: 9-20.

702

703 Shterzer N, Mizrahi I (2015). The animal gut as a melting pot for horizontal gene transfer. *Can J*  
704 *Microbiol* **61**: 603-605.

705

706 Sievers F, Higgins DG (2018). Clustal Omega for making accurate alignments of many protein  
707 sequences. *Protein Sci* **27**: 135-145.

708

709 Simão FA, Waterhouse RM, Ioannidis P, Kriventseva EV, Zdobnov EM (2015). BUSCO:  
710 assessing genome assembly and annotation completeness with single-copy orthologs.  
711 *Bioinformatics* **31**: 3210-3212.

712

713 Soucy SM, Huang J, Gogarten JP (2015). Horizontal gene transfer: building the web of life.  
714 *Nature Rev Genet* **16**: 472-482.

715

716 Stewart RD, Auffret MD, Warr A, Wiser AH, Press MO, Langford KW *et al* (2018). Assembly  
717 of 913 microbial genomes from metagenomic sequencing of the cow rumen. *Nat Commun* **9**: 870.

718

- 719 Sun GL, Yang ZF, Ishwar A, Huang JL (2010). Algal genes in the closest relatives of animals.  
720 *Mol Biol Evol* **27**: 2879-2889.  
721
- 722 Syvanen M (2012). Evolutionary implications of horizontal gene transfer. *Annu Rev Genet* **46**:  
723 341-358.  
724
- 725 Tapio I, Shingfield KJ, McKain N, Bonin A, Fischer D, Bayat AR *et al* (2016). Oral Samples as  
726 Non-Invasive Proxies for Assessing the Composition of the Rumen Microbial Community. *PLoS*  
727 *one* **11**: e0151220.  
728
- 729 Taylor JW, Berbee ML (2006). Dating divergences in the Fungal Tree of Life: review and new  
730 analyses. *Mycologia* **98**: 838-849.  
731
- 732 Wang X, Liu X, Groenewald JZ (2017). Phylogeny of anaerobic fungi (phylum  
733 Neocallimastigomycota), with contributions from yak in China. *Antonie Van Leeuwenhoek* **110**:  
734 87-103.  
735
- 736 Wiedenbeck J, Cohan FM (2011). Origins of bacterial diversity through horizontal genetic  
737 transfer and adaptation to new ecological niches. *FEMS Microbiol Rev* **35**: 957-976.  
738
- 739 Wisecaver JH, Brosnahan ML, Hackett JD (2013). Horizontal gene transfer is a significant driver  
740 of gene innovation in dinoflagellates. *Genome Biol Evol* **5**: 2368-2381.  
741

742 Youssef NH, Couger MB, Struchtemeyer CG, Ligginstoffer AS, Prade RA, Najjar FZ *et al*

743 (2013). Genome of the anaerobic fungus *Orpinomyces* sp. C1A reveals the unique evolutionary

744 history of a remarkable plant biomass degrader *Appl Environ Microbiol* **79**: 4620-4634.

745

746 Youssef NH, Rinke C, Stepanauskas R, Farag I, Woyke T, Elshahed MS (2015). Insights into the

747 metabolism, lifestyle and putative evolutionary history of the novel archaeal phylum

748 'Diapherotrites'. *ISME J* **9**: 447-460.

749

750

751 Figure Legends

752 Fig. 1. Workflow diagram describing the procedure employed for identification HGT events in  
753 Neocallimastigomycota datasets analyzed in this study.

754 Fig. 2. (A) Total Number of HGT events identified per AGF genus. (B) Distribution pattern of  
755 HGT events in AGF transcriptomes in all seven AGF genera examined.

756 Fig. 3. Identity of HGT donors and their contribution to the various functional classes. The X-  
757 axis shows the absolute number of events belonging to each of the functional classes shown in  
758 the legend. The tree is intended to show the relationship between the donors taxa and is not  
759 drawn to scale. Bacterial donors are shown with red branches depicting the phylum-level, with  
760 the exception of Firmicutes and Bacteroidetes donors, where the order-level is shown, and  
761 Proteobacteria, where the class-level is shown. Archaeal donors are shown with green branches  
762 and all belonged to the Methanobacteriales order of Euryarchaeota. Eukaryotic donors are shown  
763 with blue branches. Only the 262 events from a definitive-taxon donor are shown in the figure.  
764 The other 65 events were clearly nested within a non-fungal clade, but a definitive donor taxon  
765 could not be ascertained. Functional classification of the HGT events, determined by searching  
766 the Conserved Domain server (Marchler-Bauer et al 2017) against the COG database are shown  
767 in B. For events with no COG classification, a search against the KEGG orthology database  
768 (Kanehisa et al 2012) was performed. For the major COG/KEGG categories (metabolism,  
769 cellular processes and signaling, and Information storage and processing), sub-classifications are  
770 shown in C, D, and E, respectively.

771 Fig. 4. HGT impact on AGF central metabolic abilities. Pathways for sugar metabolism are  
772 highlighted in blue, pathways for amino acid metabolism are highlighted in red, pathways for  
773 cofactor metabolism are highlighted in green, pathways for nucleotide metabolism are

774 highlighted in grey, pathways for lipid metabolism are highlighted in orange, fermentation  
775 pathways are highlighted in purple, while pathways for detoxification are highlighted in brown.  
776 The double black lines depict the hydrogenosomal outer and inner membrane. Arrows  
777 corresponding to enzymes encoded by horizontally transferred transcripts are shown with thicker  
778 dotted lines and are given numbers 1 through 48 as follows. Sugar metabolism (1-11): 1. Xylose  
779 isomerase, 2. Xylulokinase, 3. Ribokinase, 4. 2,3-bisphosphoglycerate-independent  
780 phosphoglycerate mutase, 5. 2,3-bisphosphoglycerate-dependent phosphoglycerate mutase, 6.  
781 Phosphoenolpyruvate synthase, 7. Phosphoenolpyruvate carboxykinase (GTP), 8. Aldose-1-  
782 epimerase, 9. Galactokinase, 10. Galactose-1-phosphate uridylyltransferase, 11. UDP-glucose-4-  
783 epimerase. Amino acid metabolism (12-20): 12. Aspartate-ammonia ligase, 13. Tryptophan  
784 synthase (TrpB), 14. Tryptophanase, 15. Monofunctional prephenate dehydratase, 16. Serine-O-  
785 acetyltransferase, 17. Cysteine synthase, 18. Low-specificity threonine aldolase, 19. 5'-  
786 methylthioadenosine nucleosidase/5'-methylthioadenosine phosphorylase (MTA phosphorylase),  
787 20. Arginase. Cofactor metabolism (21-28): 21. Pyridoxamine 5'-phosphate oxidase, 22. L-  
788 aspartate oxidase (NadB), 23. Quinolinate synthase (NadA), 24. NH<sub>3</sub>-dependent NAD(+)   
789 synthetase (NadE), 25. 2-dehydropantoate 2-reductase, 26. dephosphoCoA kinase, 27.  
790 Dihydrofolate reductase (DHFR) family, 28. Dihydropteroate synthase. Nucleotide metabolism  
791 (29-36): 29. GMP reductase, 30. Trifunctional nucleotide phosphoesterase, 31. deoxyribose-  
792 phosphate aldolase (DeoC), 32. Oxygen-sensitive ribonucleoside-triphosphate reductase class III  
793 (NrdD), 33. nucleoside/nucleotide kinase family protein, 34. Cytidylate kinase-like family, 35.  
794 thymidylate synthase, 36. thymidine kinase. Pyruvate metabolism (fermentation pathways) (37-  
795 41): 37. D-lactate dehydrogenase, 38. bifunctional aldehyde/alcohol dehydrogenase family of Fe-  
796 alcohol dehydrogenase, 39. Butanol dehydrogenase family of Fe-alcohol dehydrogenase, 40. Zn-

797 type alcohol dehydrogenase, 41. Fe-only hydrogenase. Detoxification reactions (42-45): 42.  
798 Phosphoglycolate phosphatase, 43. Glyoxal reductase, 44. Glyoxalase I, 45. Glyoxalase II. Lipid  
799 metabolism (46-48): 46. CDP-diacylglycerol--serine O-phosphatidyltransferase, 47.  
800 lysophospholipid acyltransferase LPEAT, 48. methylene-fatty-acyl-phospholipid synthase.  
801 Abbreviations: CDP-DAG, CDP-diacylglycerol; 7,8 DHF, 7,8 dihydrofolate; EthA,  
802 ethanolamine; Gal, galactose; GAP, glyceraldehyde-3-P; Glu, glucose; GSH, glutathione; I,  
803 complex I NADH dehydrogenase; NaMN, Nicotinate D-ribonucleotide; Orn, ornithine; PEP,  
804 phosphoenol pyruvate; Phenyl-pyr, phenylpyruvate; PRPP, phosphoribosyl-pyrophosphate; Ptd,  
805 phosphatidyl; SAM; S-adenosylmethionine; THF, tetrahydrofolate.  
806 Fig. 5. (A) Maximum likelihood tree showing the phylogenetic affiliation of AGF galactokinase.  
807 AGF genes highlighted in light blue clustered within the Flavobacteriales order of the  
808 Bacteroidetes phylum and were clearly nested within the bacterial domain (highlighted in green)  
809 attesting to their non-fungal origin. Fungal galactokinase representatives are highlighted in pink.  
810 (B) Maximum likelihood tree showing the phylogenetic affiliation of AGF Fe-only hydrogenase.  
811 AGF genes highlighted in light blue clustered within the Thermotogae phylum and were clearly  
812 nested within the bacterial domain (highlighted in green) attesting to their non-fungal origin.  
813 *Stygiella incarcerata* (anaerobic Jakobidae) clustered with the Thermotogae as well as has  
814 recently been suggested (Leger et al 2016). Fe-only hydrogenases from *Gonopodya prolifera*  
815 (Chytridiomycota) clustered with the AGF genes. This is an example of one of the rare occasions  
816 (n=31) where a non-AGF basal fungal representative showed an HGT pattern with the same  
817 donor affiliation as the Neocallimastigomycota. Other basal fungal Fe-only hydrogenase  
818 representatives are highlighted in pink and clustered outside the bacterial domain. (C) Maximum  
819 likelihood tree showing the phylogenetic affiliation of AGF L-aspartate oxidase (NadB). AGF

820 genes highlighted in light blue clustered within the Delta-Proteobacteria class and were clearly  
821 nested within the bacterial domain (highlighted in green) attesting to their non-fungal origin. As  
822 de-novo NAD synthesis in fungi usually follow the five-enzyme pathway starting from  
823 tryptophan, as opposed to the two-enzyme pathway from aspartate, no NadB were found in non-  
824 AGF fungi and hence no fungal cluster is shown in the tree. (D) Maximum likelihood tree  
825 showing the phylogenetic affiliation of AGF oxygen-sensitive ribonucleotide reductase (NrdD).  
826 AGF genes highlighted in light blue clustered with representatives from Candidate phylum  
827 Dependuntiae and were clearly nested within the bacterial domain (highlighted in green) attesting  
828 to their non-fungal origin. Fungal NrdD representatives are highlighted in pink. GenBank  
829 accession numbers are shown in parentheses. Alignment was done using the standalone Clustal  
830 Omega (Sievers and Higgins 2018) and trees were constructed using IQ-tree (Nguyen et al  
831 2015).

832 Fig. 6. HGT in the AGF CAZyome shown across the seven genera studied. Glycosyl Hydrolase  
833 (GH), Carboxyl Esterase (CE), and Polysaccharide Lyase (PL) families are shown to the left.  
834 The color of the cells depicts the prevalence of HGT within each family. Red indicates that  
835 100% of the CAZyme transcripts were horizontally transferred. Shades of red-orange indicate  
836 that HGT contributed to > 50% of the transcripts belonging to that CAZy family. Blue indicates  
837 that 100% of the CAZyme transcripts were of fungal origin. Shades of blue indicate that HGT  
838 contributed to < 50% of the transcripts belonging to that CAZy family. The numbers in each cell  
839 indicate the affiliation of the HGT donor as shown in the key to the right.

840 Fig. 7. Principal-component analysis biplot of the distribution of CAZy families in AGF  
841 genomes (★), compared to representatives of other basal fungi belonging to the  
842 Mucoromycotina (●), Chytridiomycota (●), Blastocladiomycota (■), Entomophthoromycotina

843 (●), Mortierellomycotina (△), Glomeromycota (⊕), Kickxellomycotina (▽), and  
844 Zoopagomycotina (✕). CAZy families are shown as colored dots. The color code used was as  
845 follows: green, CAZy families that are absent from AGF genomes; black, CAZy families present  
846 in AGF genomes and with an entirely fungal origin; blue, CAZy families present in AGF  
847 genomes and for which HGT contributed to < 50% of the transcripts in the examined  
848 transcriptomes; red, CAZy families present in AGF genomes and for which HGT contributed to  
849 > 50% of the transcripts in the examined transcriptomes. The majority of CAZyme families  
850 defining the AGF CAZyome were predominantly of non-fungal origin (red and blue dots).



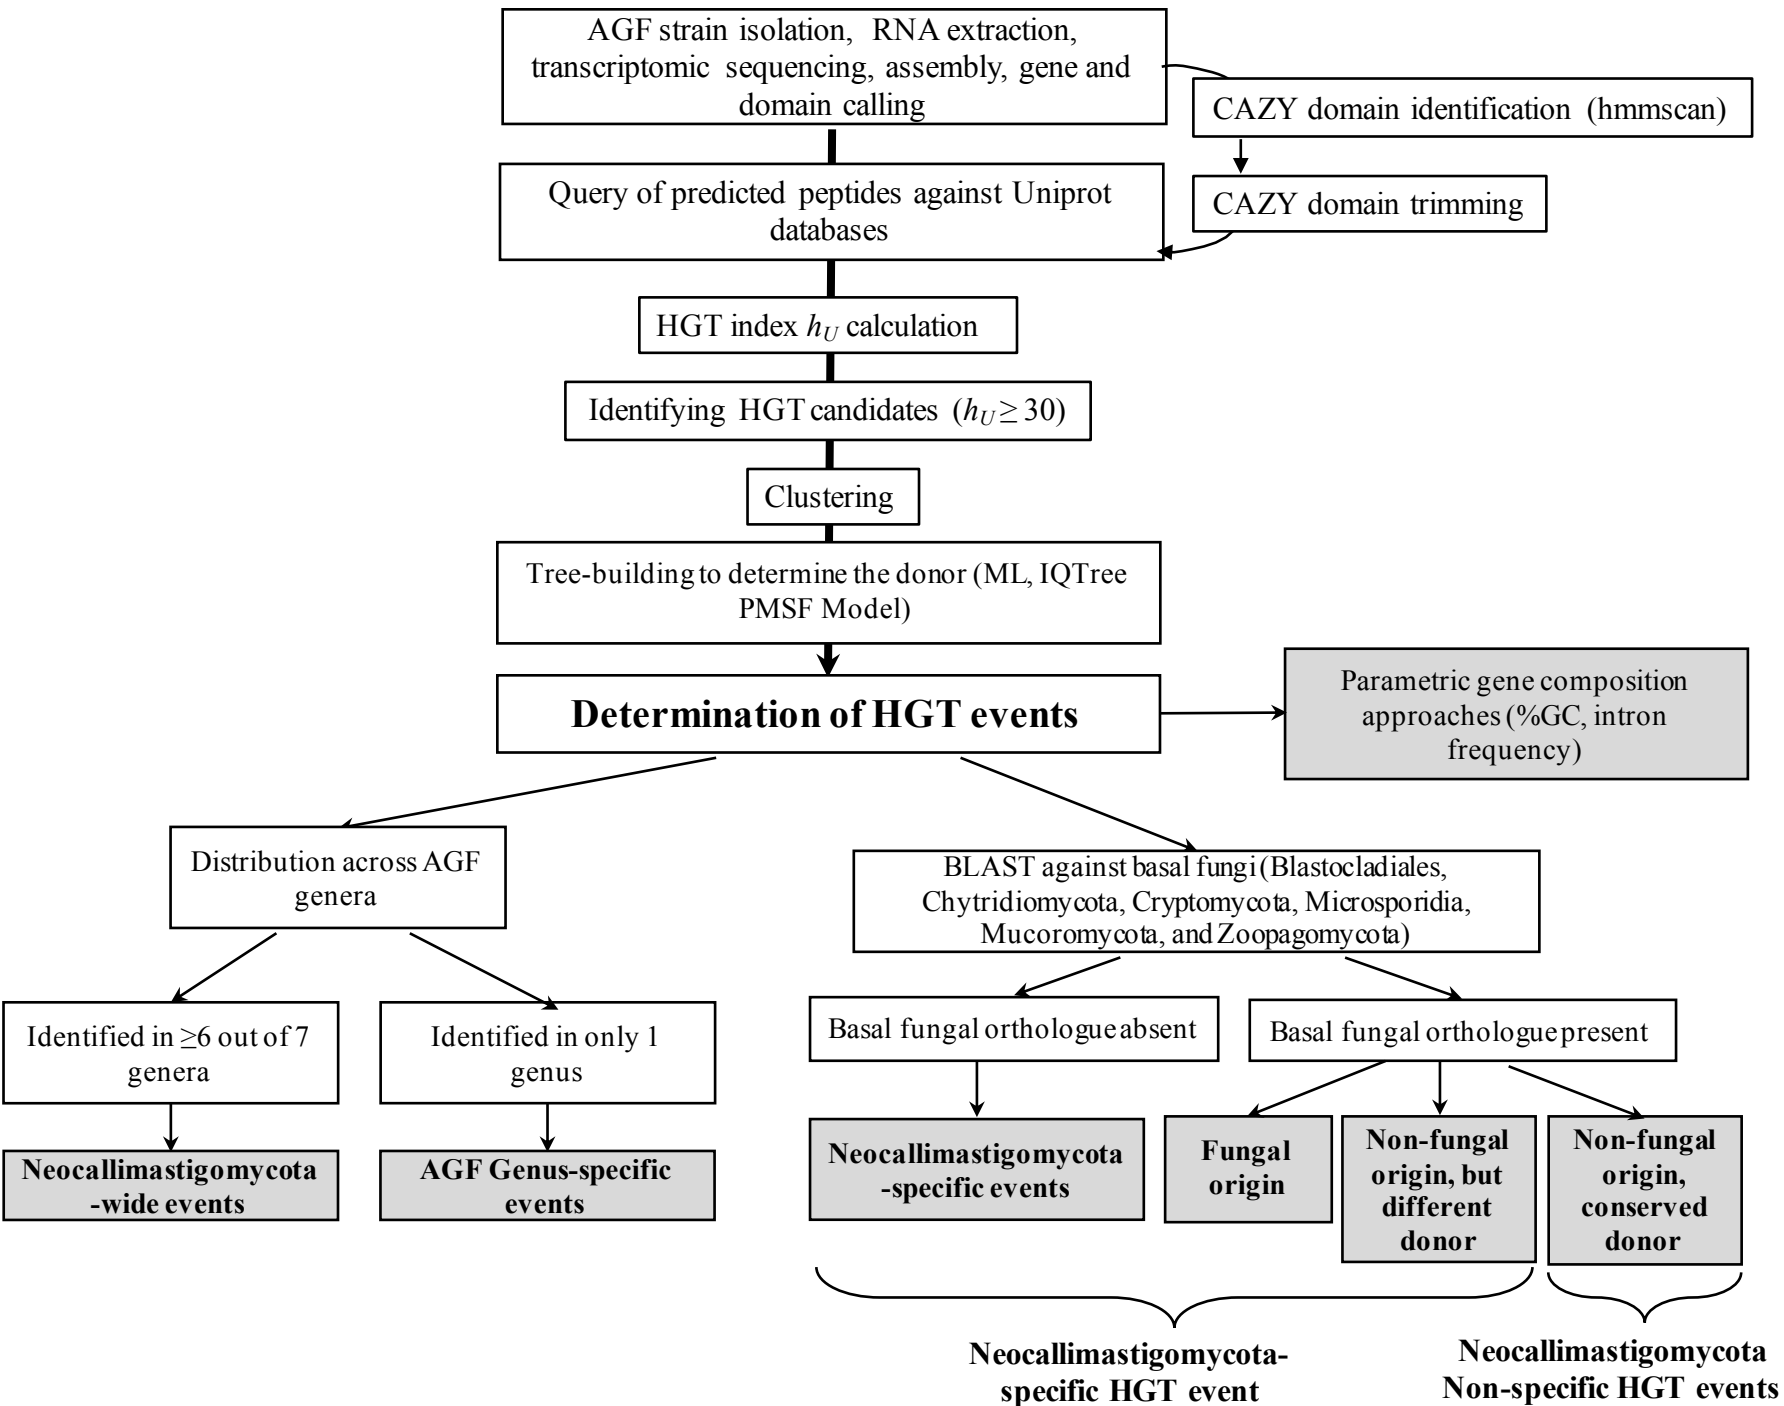

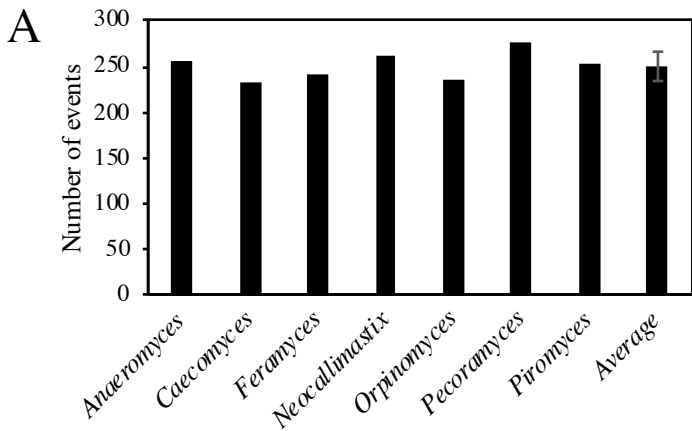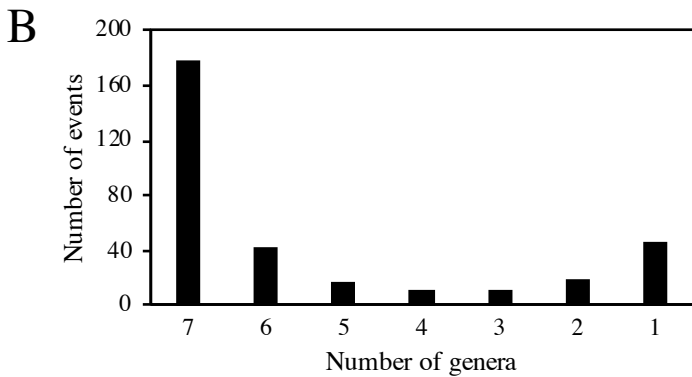

A

bioRxiv preprint doi: <https://doi.org/10.1101/487215>; this version posted December 4, 2018. The copyright holder for this preprint (which was not certified by peer review) is the author/funder, who has granted bioRxiv a license to display the preprint in perpetuity. It is made available under aCC-BY-NC-ND 4.0 International license.

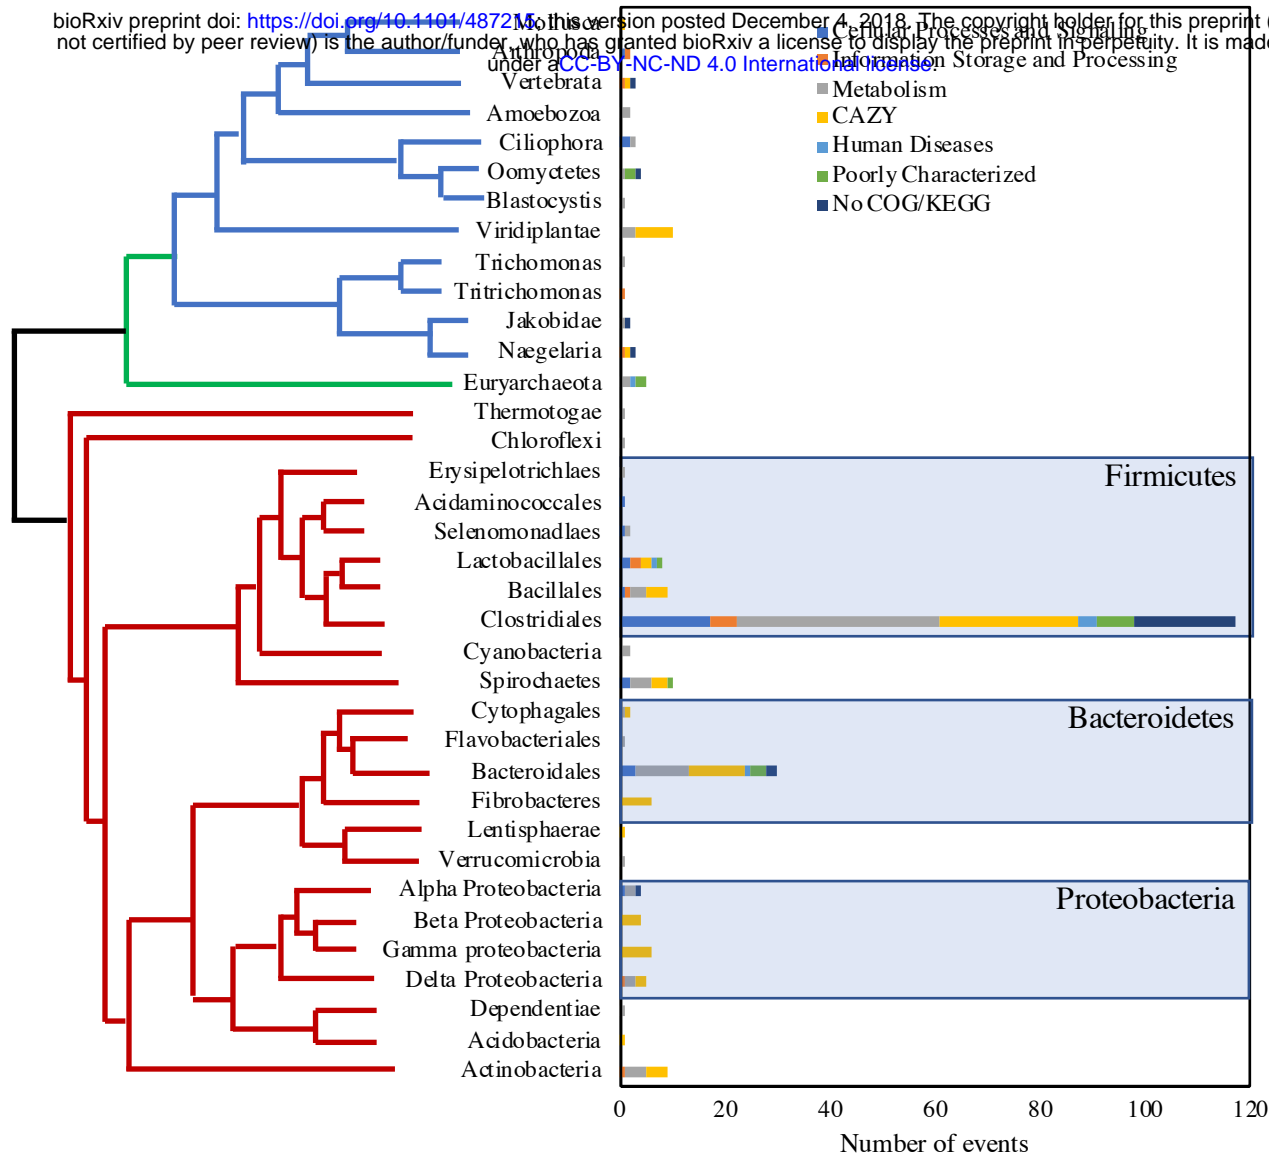

B

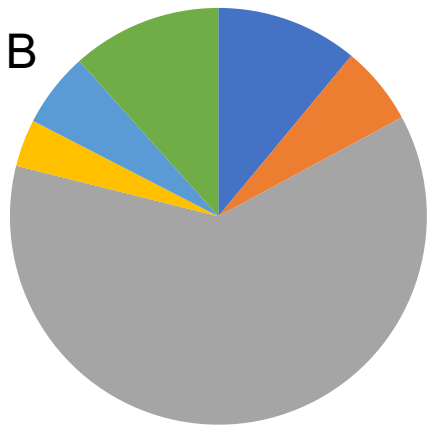

C

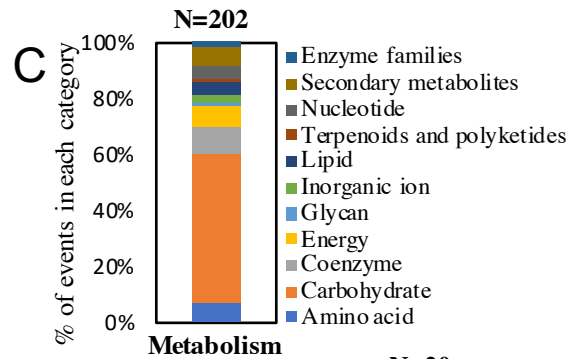

D

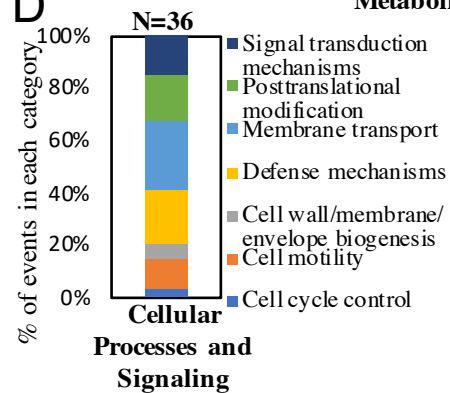

E

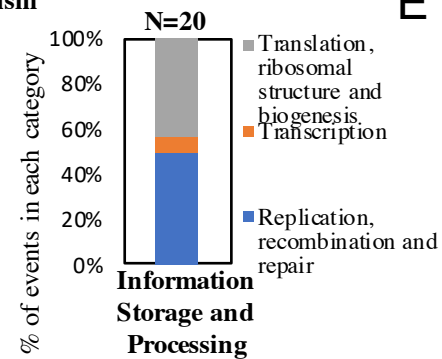

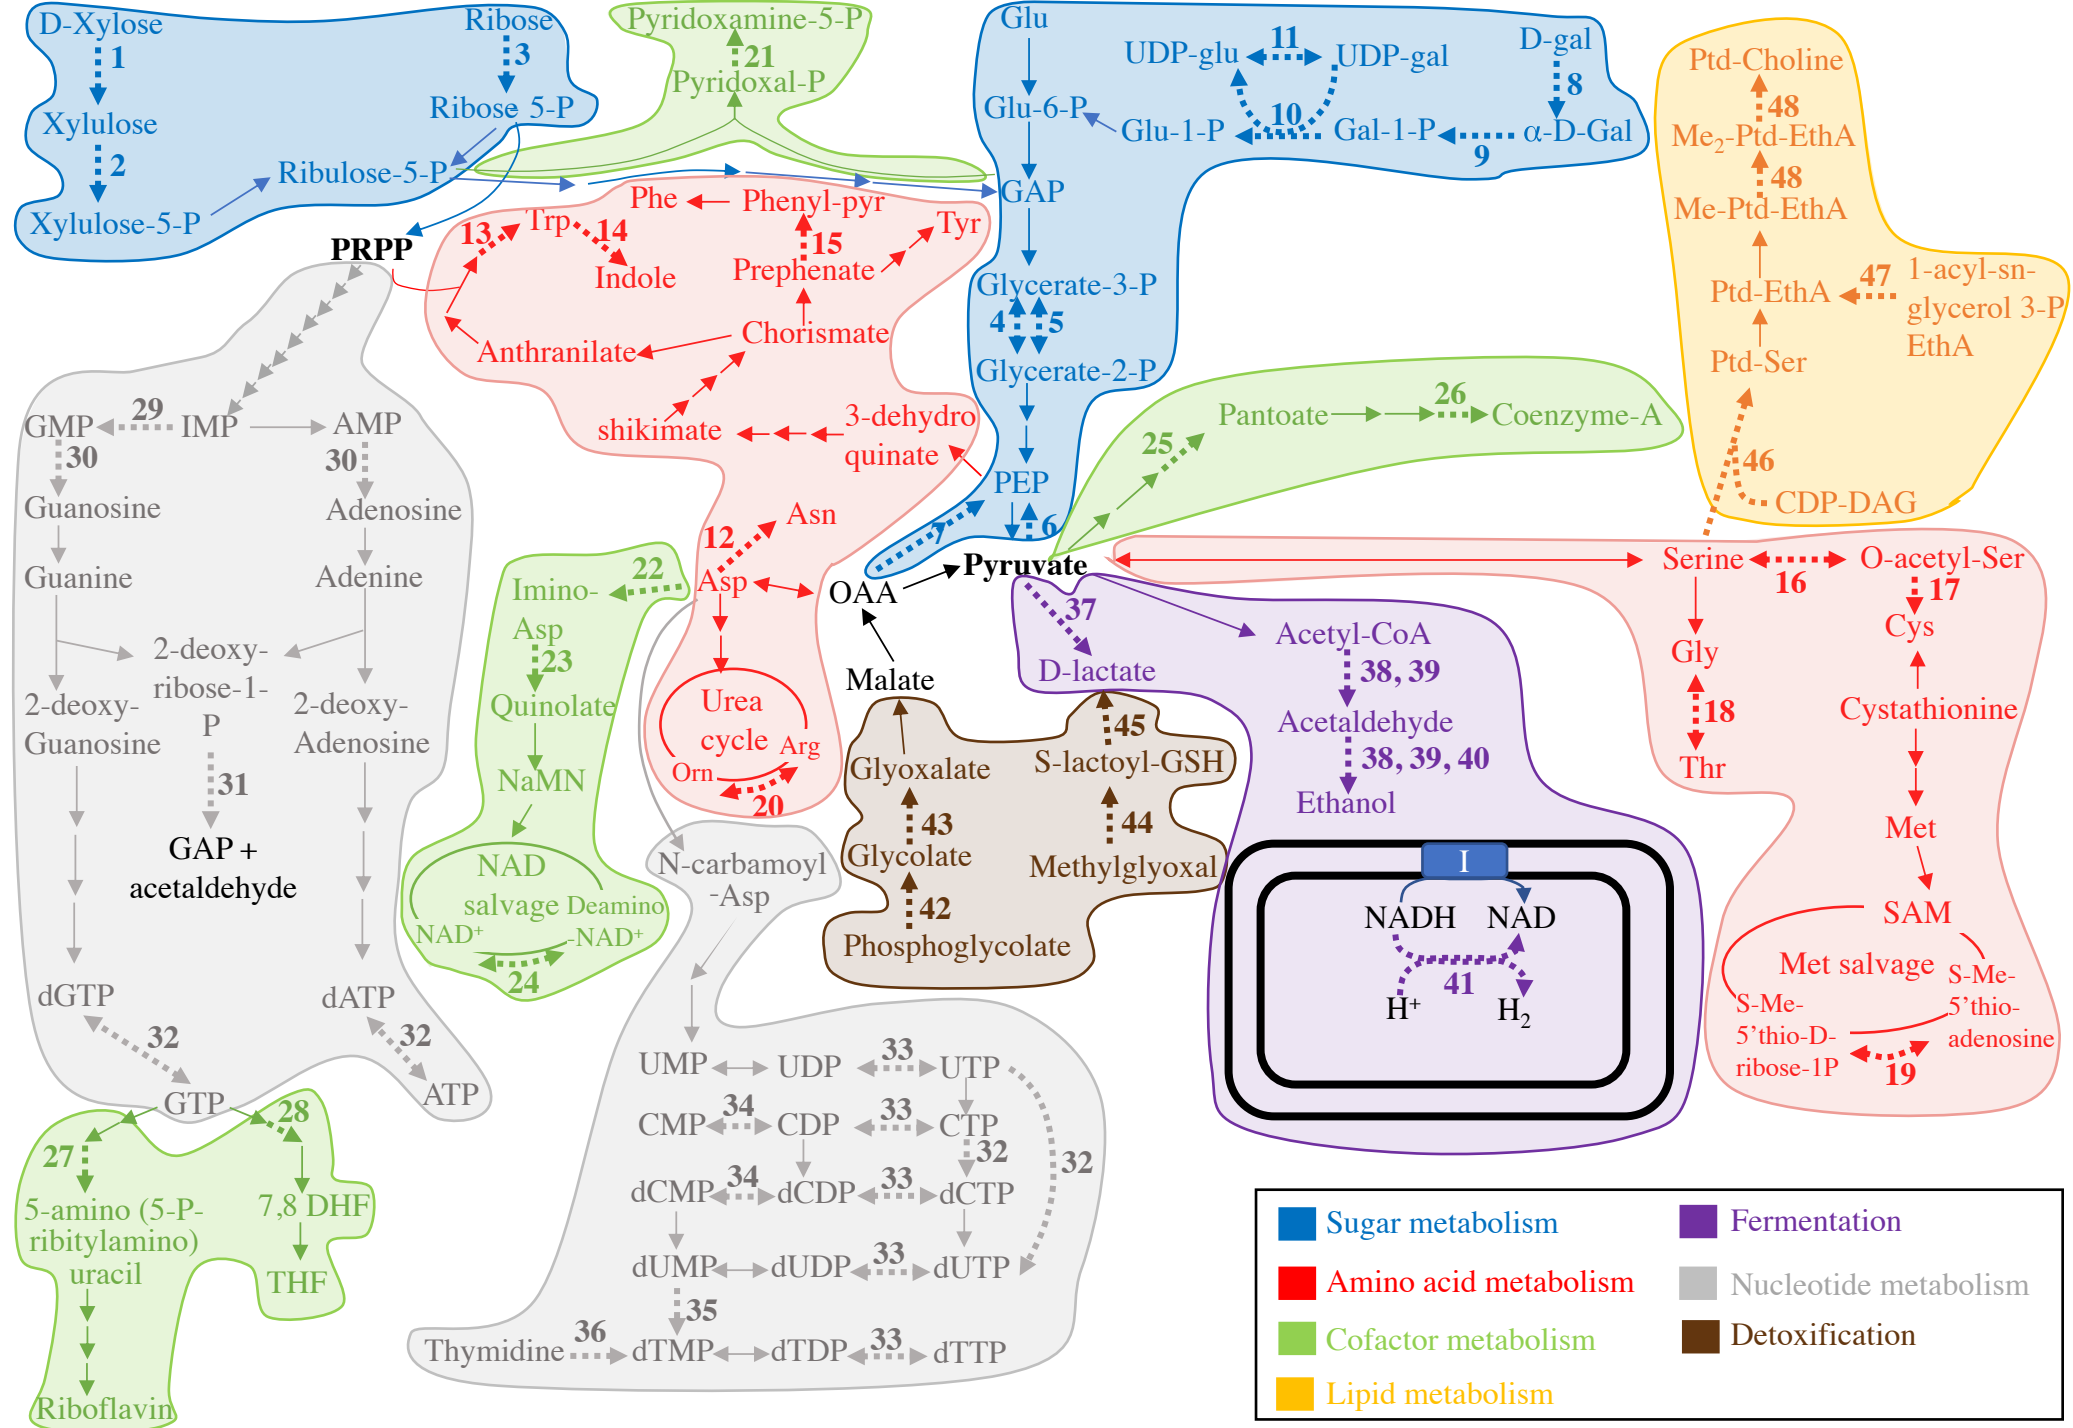

A

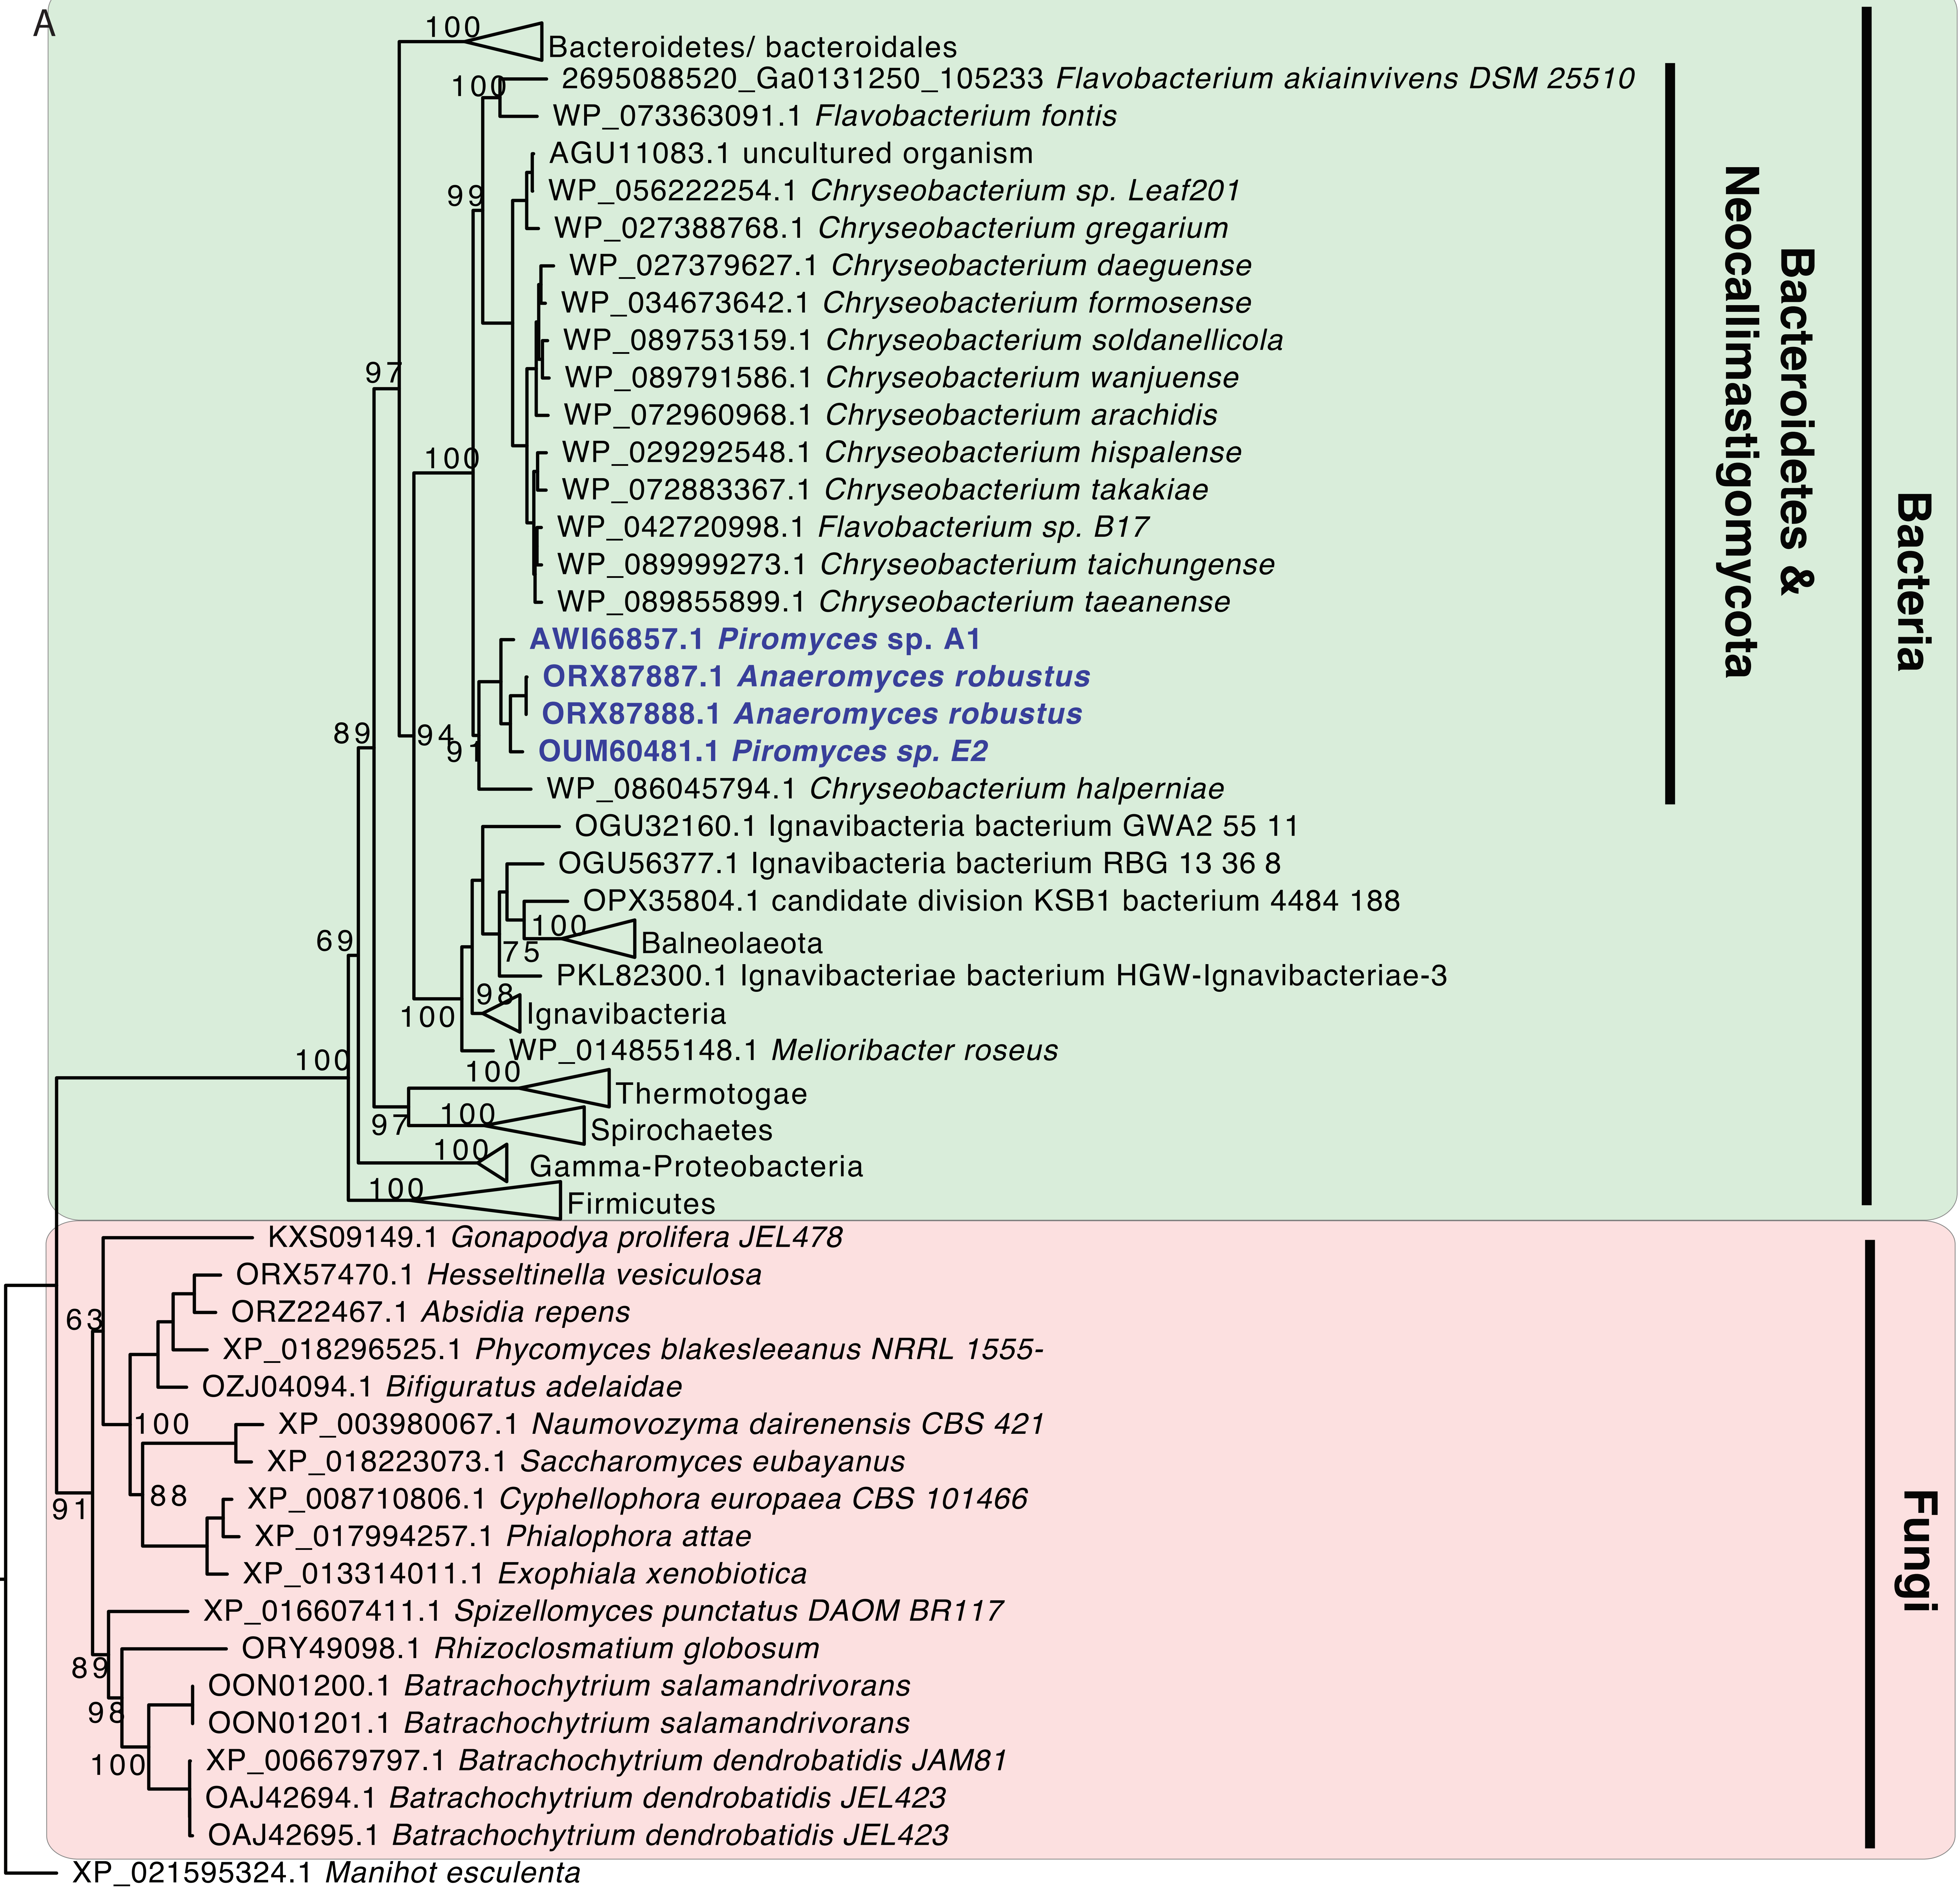

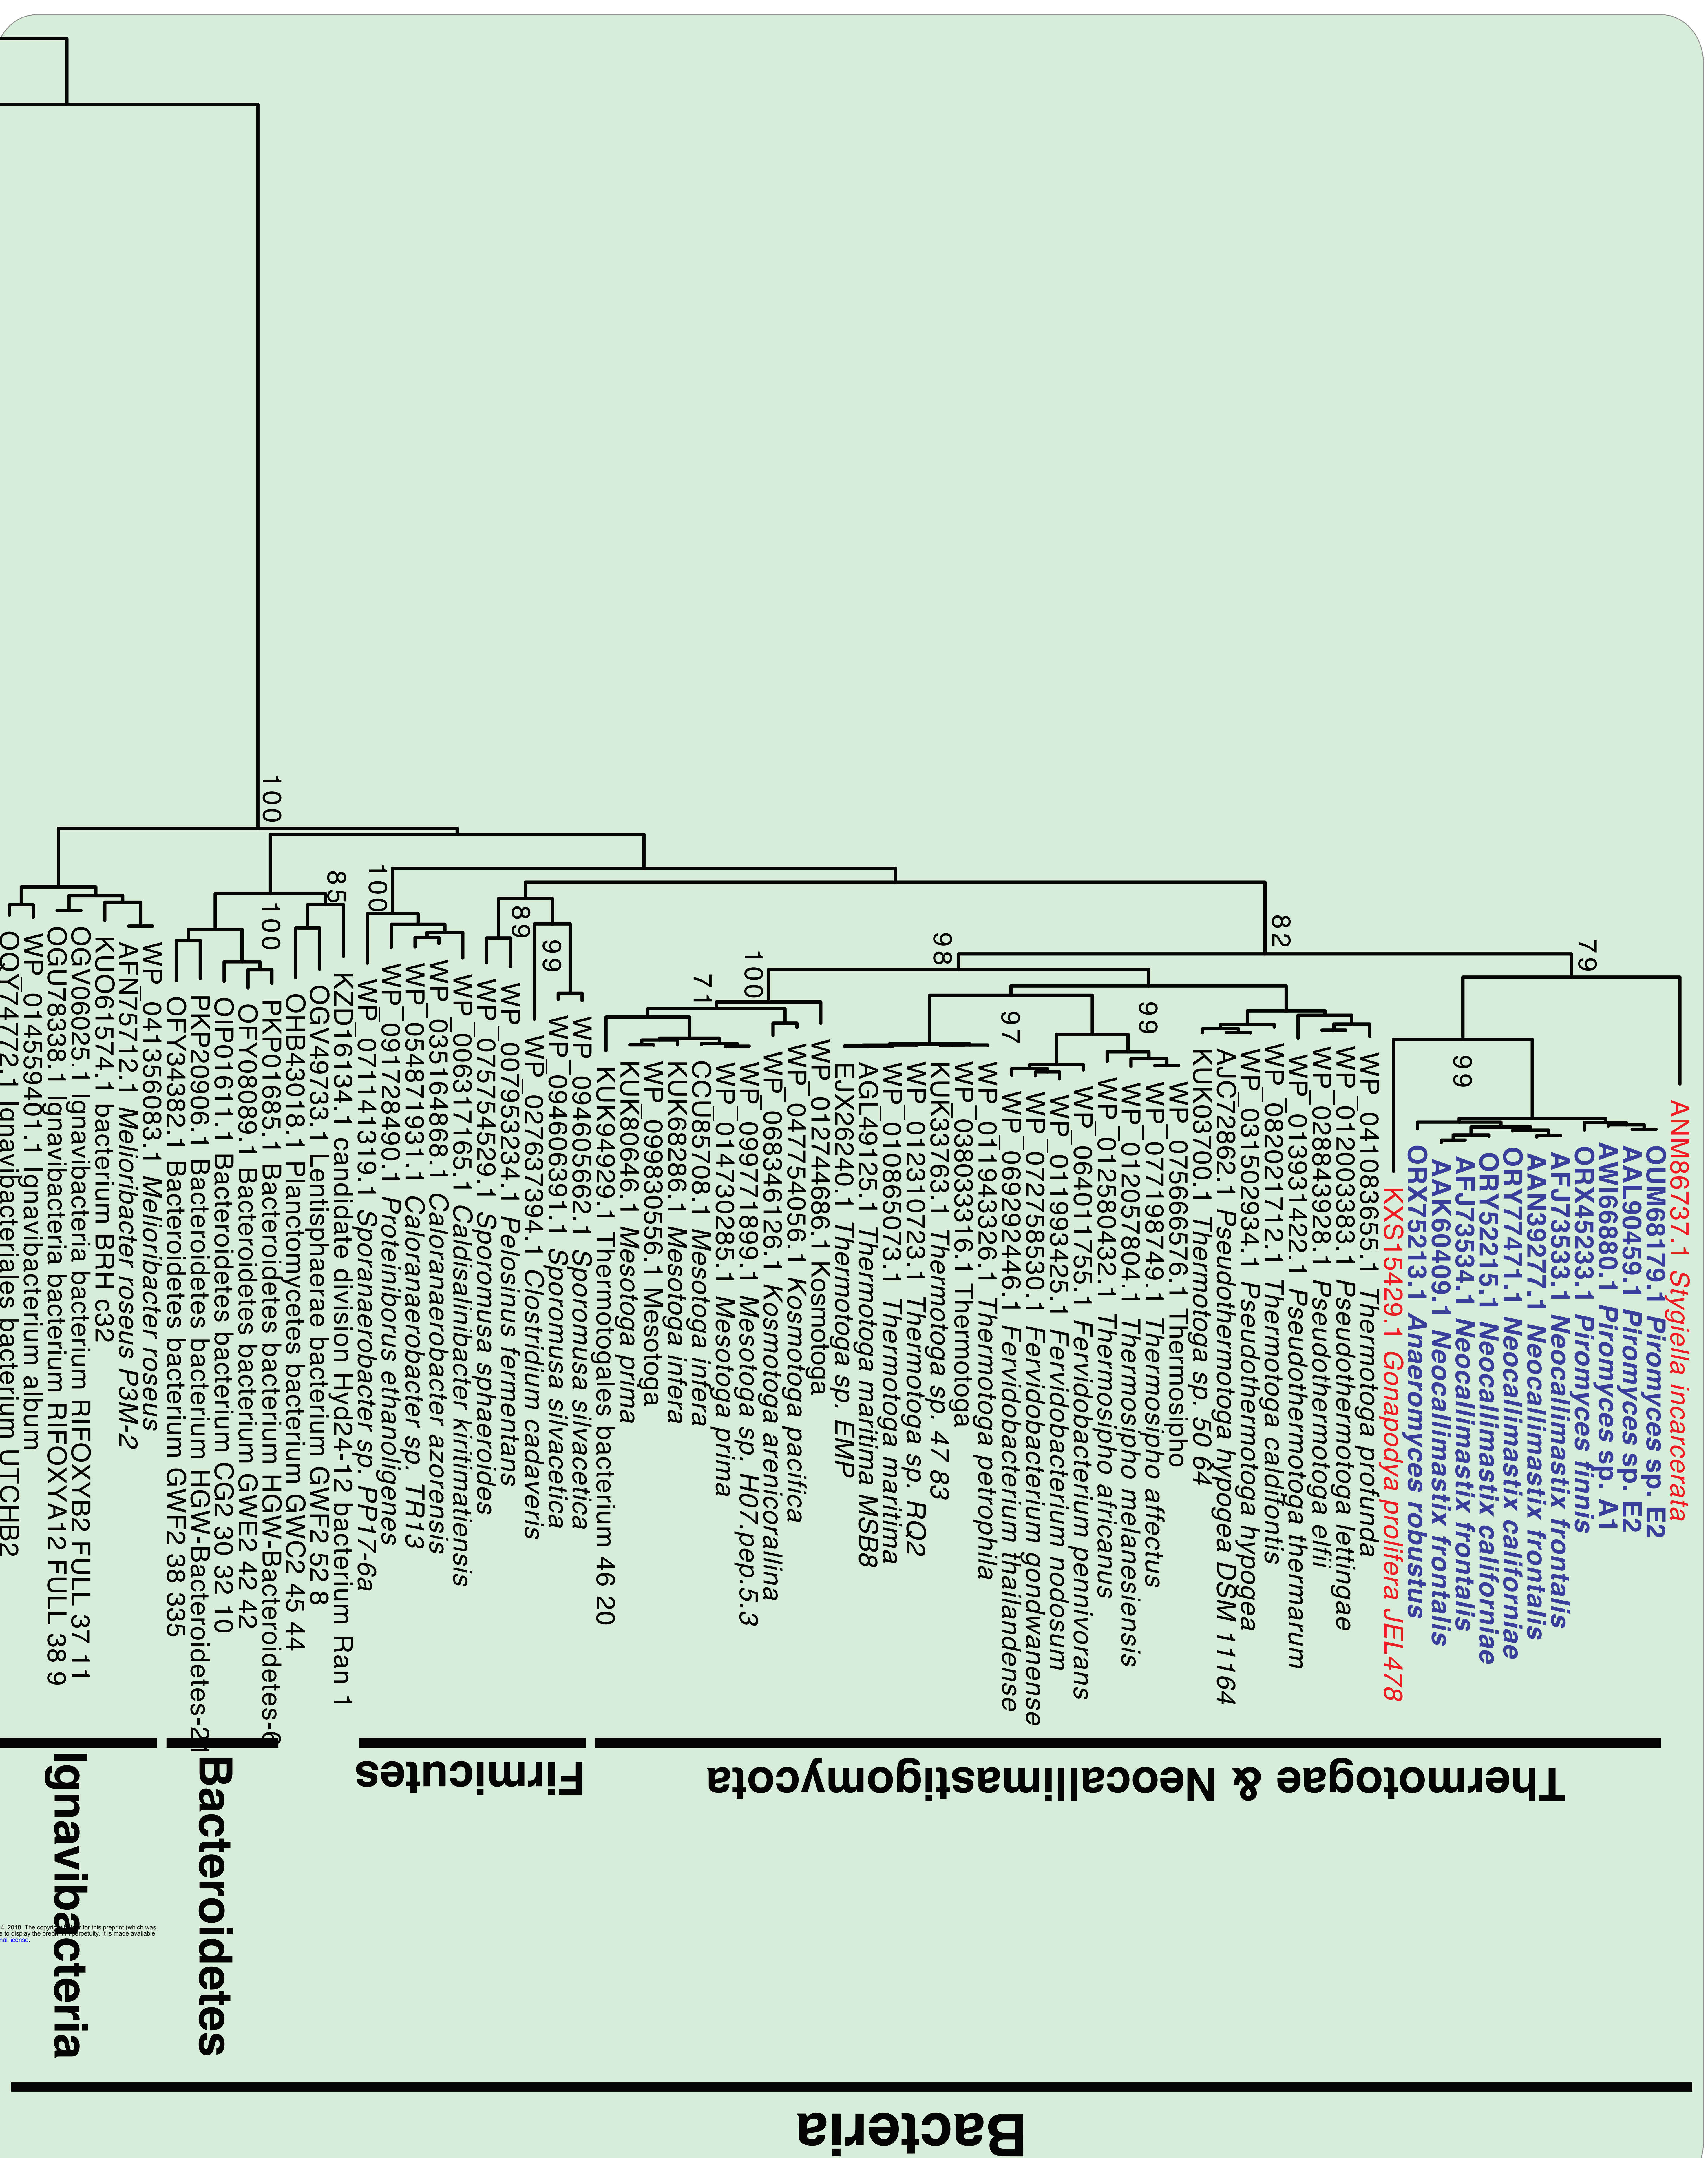

B

0.8

bioRxiv preprint doi: <https://doi.org/10.1101/188720>; this version posted December 4, 2018. The copyright holder for this preprint (which was not certified by peer review) is the author/funder, who has granted bioRxiv a license to display the preprint in perpetuity. It is made available under aCC-BY-NC-ND 4.0 International license.

**Fungi**

C

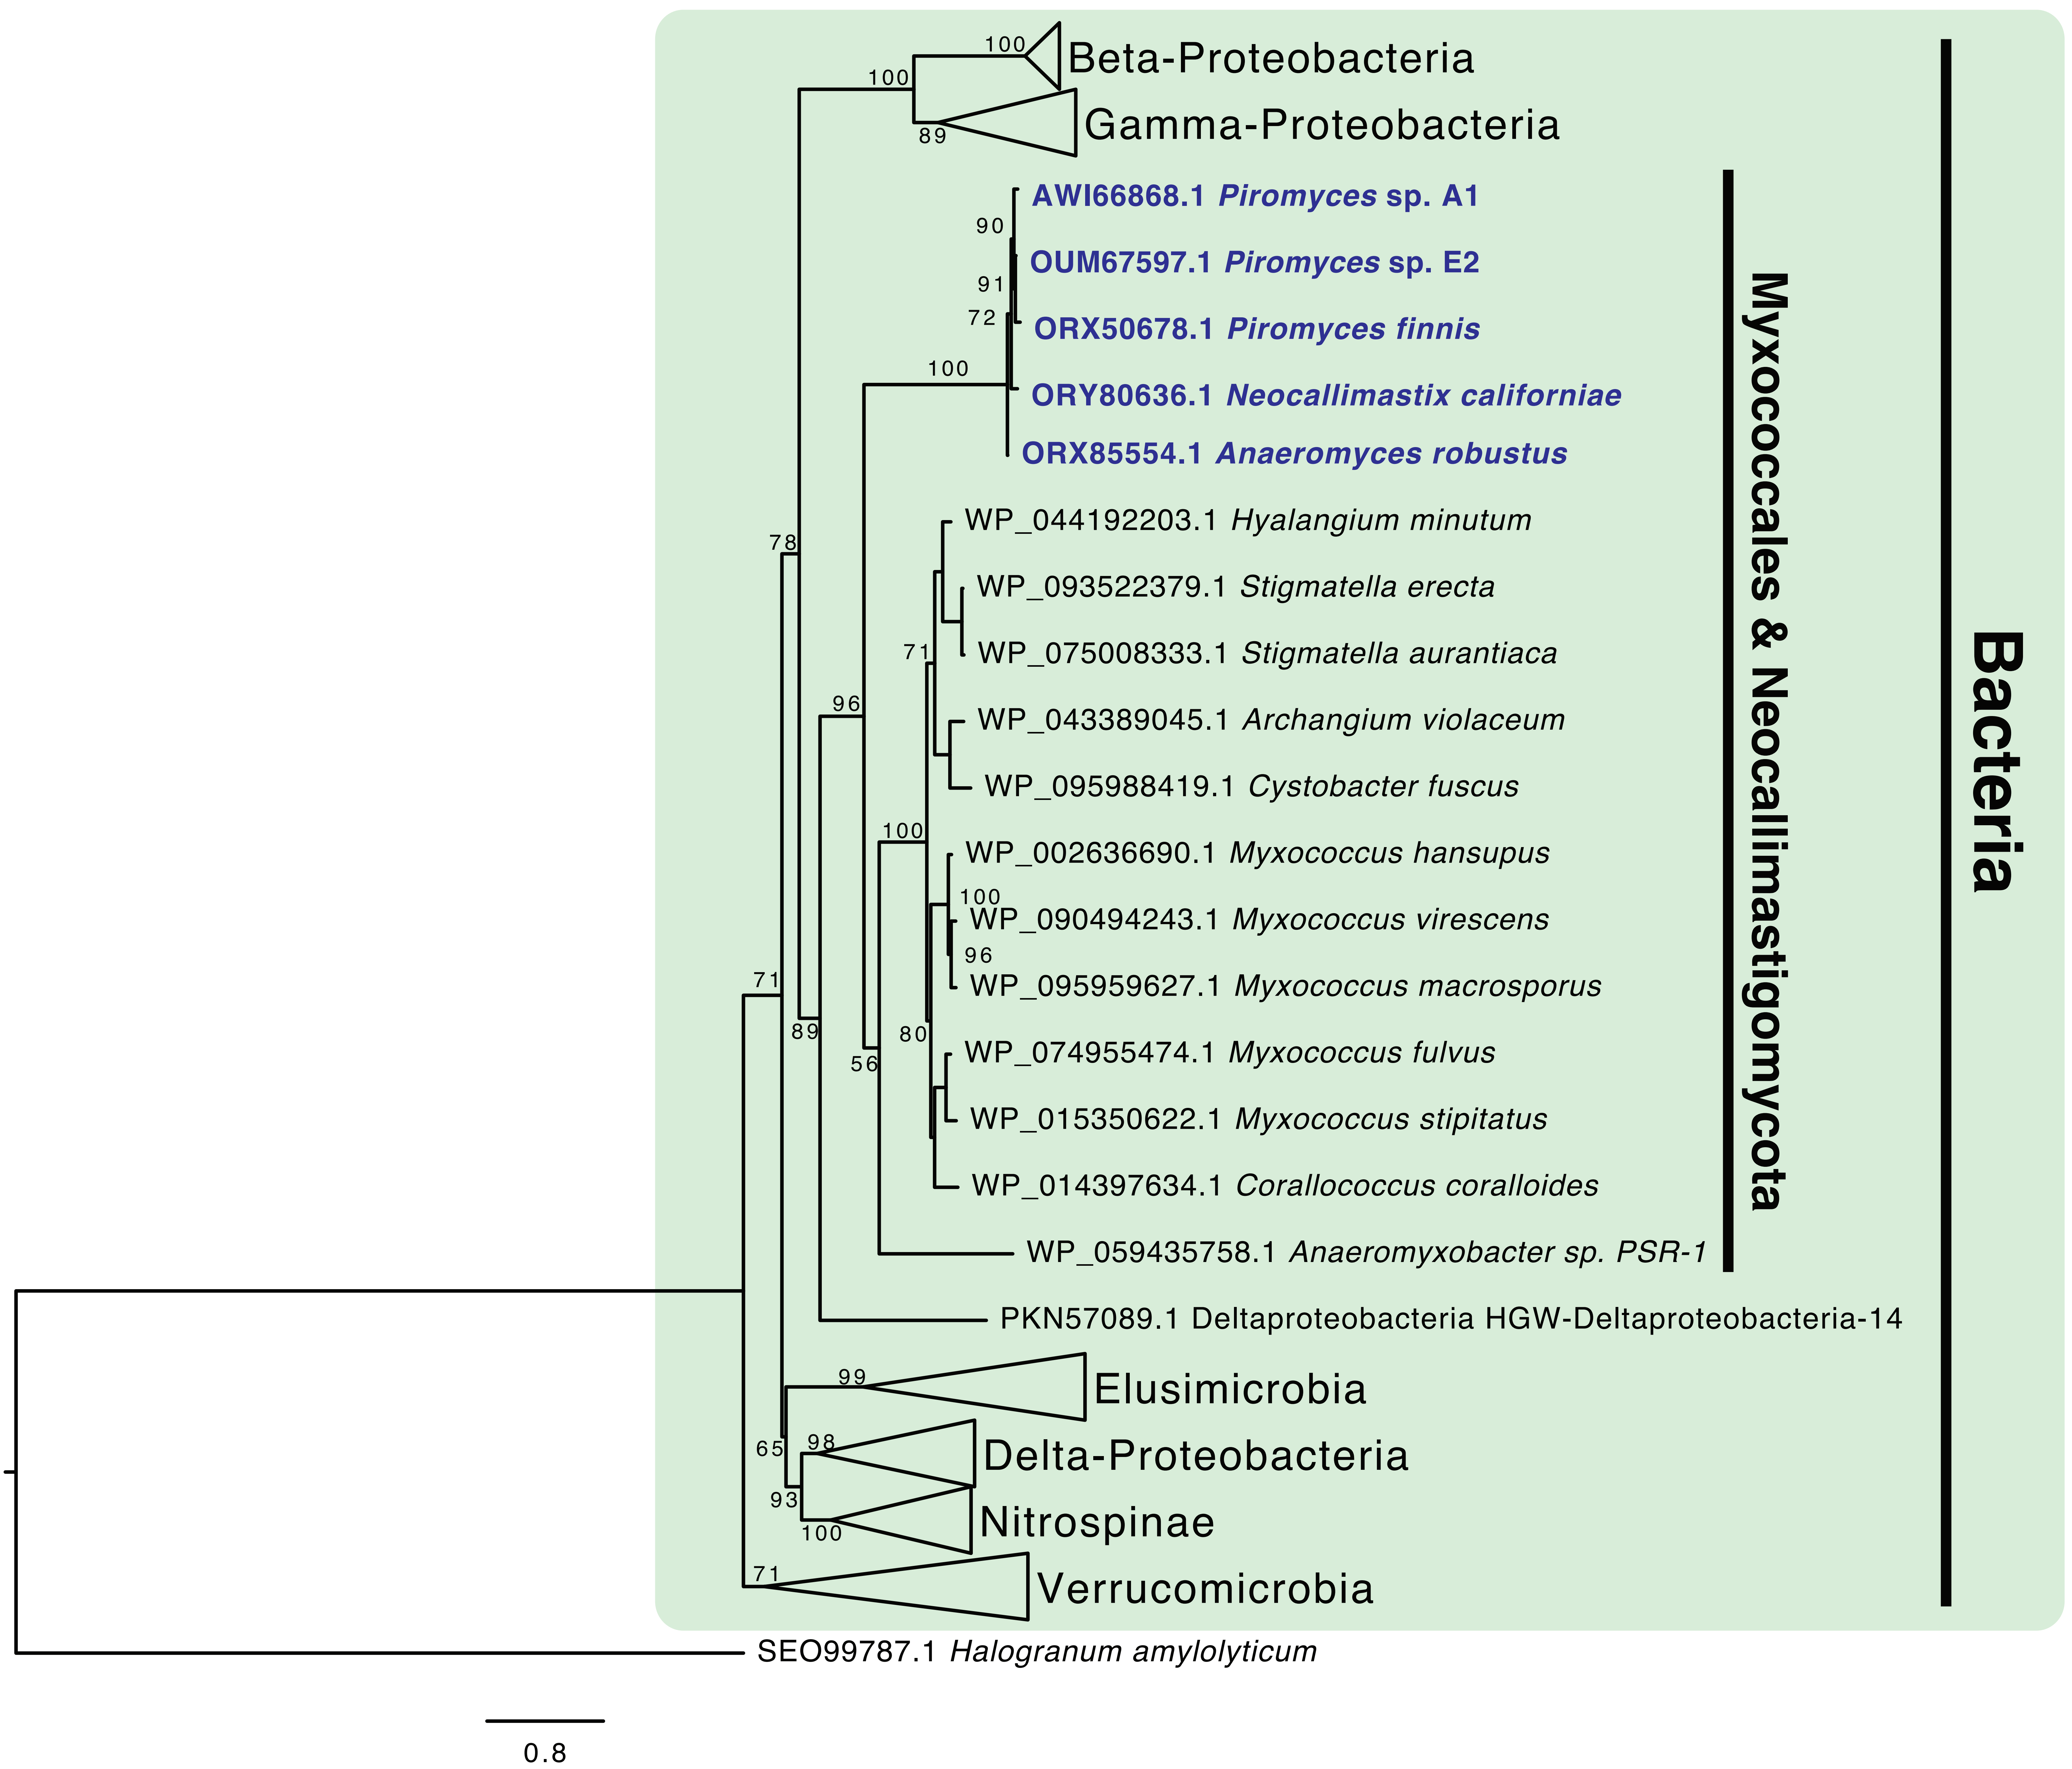

D

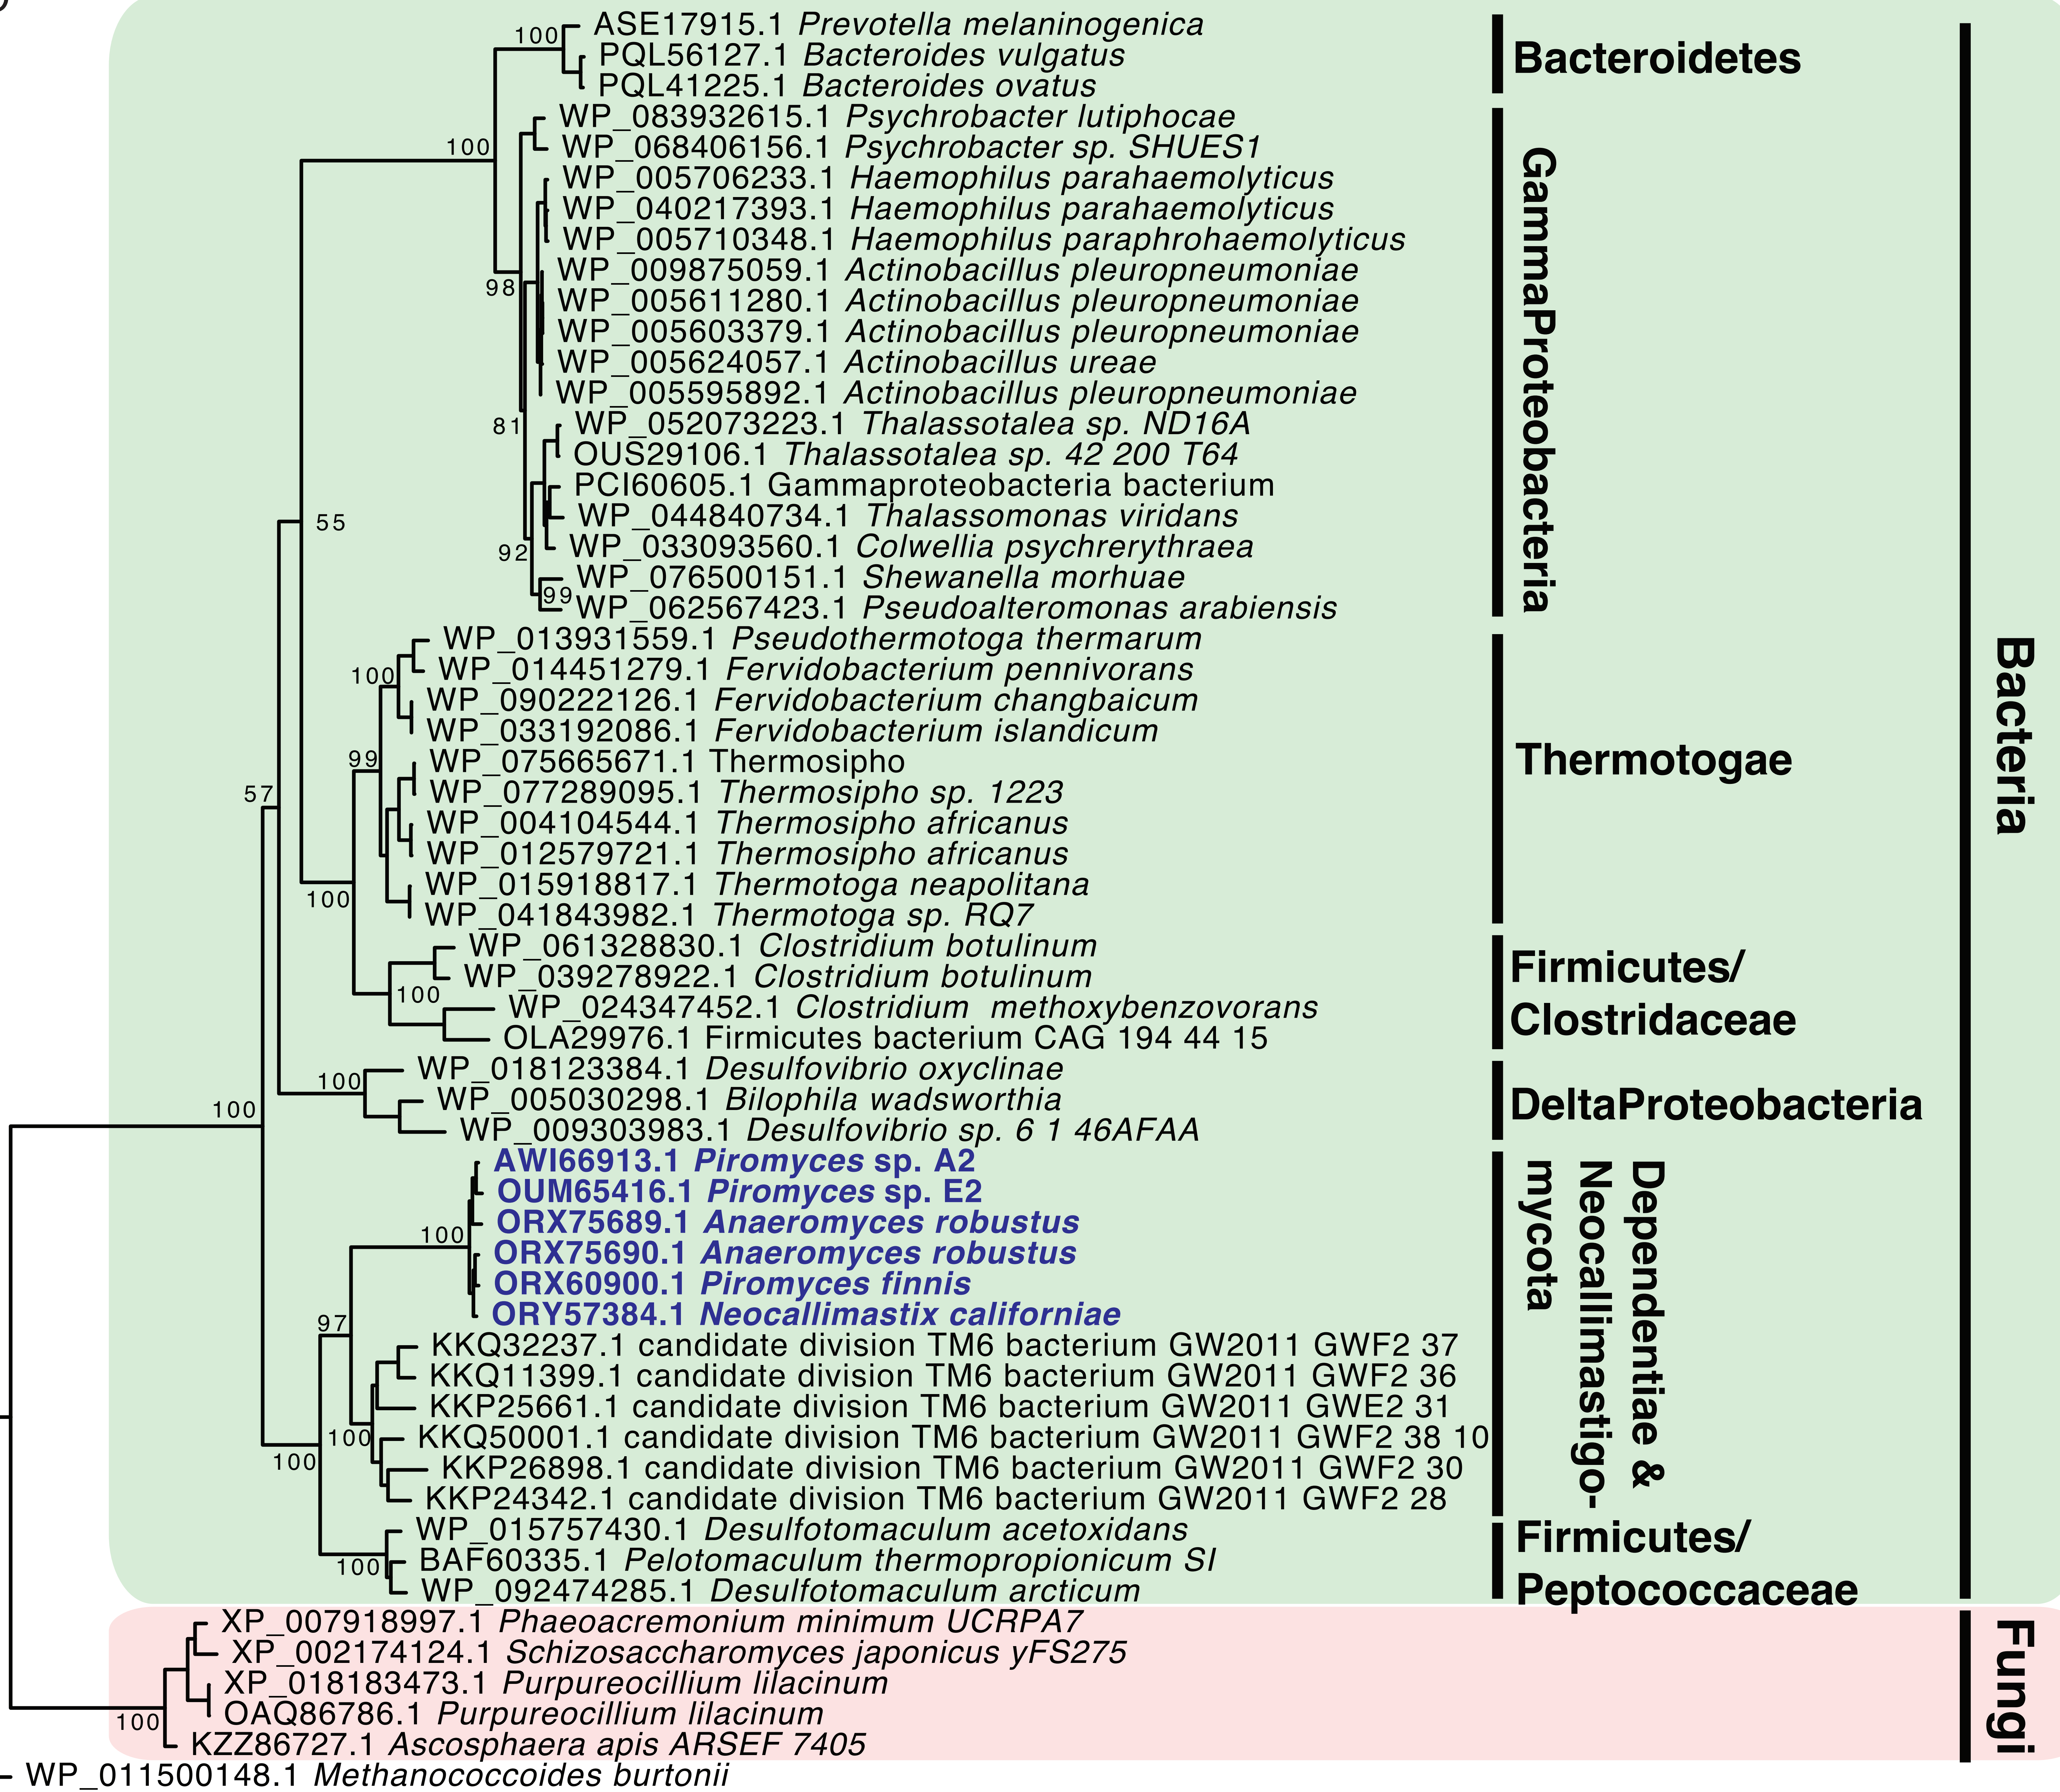



| Family | Genus       |             |             |                 |                |             |             |
|--------|-------------|-------------|-------------|-----------------|----------------|-------------|-------------|
|        | Anaeromyces | Caecomyces  | Pecoromyces | Piromyces       | Neocallimastix | Feromyces   | Orpinomyces |
| GH1    | 11, 18      | 18          | 6, 18       | 18              | 11, 18         | 18          | 7, 18       |
| GH2    | 7           |             | 7           | 7               | 7              | 7           | 7           |
| GH3    | 7, 15       | 7, 15       | 7, 15       | 7, 15           | 7              |             | 7           |
| GH5    | 2, 11       | 2, 7, 11    | 2, 7, 11    | 2, 7, 11        | 2, 7, 11       | 2, 7, 11    | 2, 7, 11    |
| GH6    | 13          | 13          | 13          | 13              | 13             | 13          | 13          |
| GH8    | 5, 6        | 6           | 5, 6        | 5, 6            | 5, 6           | 6           | 5, 6        |
| GH9    |             |             |             |                 |                |             |             |
| GH10   | 4, 7        | 4, 7        | 4, 7        | 4, 7            | 4, 7           | 4, 7        | 4, 7        |
| GH11   | 5, 7        | 5           | 5           | 5               | 5              | 5           | 5, 7        |
| GH13   | 3, 7, 8, 11 | 3, 7, 8     | 3, 7, 8, 11 | 3, 8, 11        | 3, 7, 8, 11    | 3, 7, 8, 11 | 3, 7, 8     |
| GH16   | 3, 7        |             | 3           | 7               | 3, 7, 19       | 3, 7        | 3, 7        |
| GH18   |             | 3           | 6, 12       | 6               | 6              | 6           |             |
| GH20   |             |             |             |                 |                |             |             |
| GH24   | 7, 12       |             |             |                 |                |             | 12          |
| GH25   | 7           | 7           | 7           | 7               | 7              | 7           |             |
| GH26   | 5, 15       | 5, 15       | 5, 15       | 5, 15           | 5, 15          | 15          | 15          |
| GH28   |             |             | 3           |                 | 3, 19          |             | 3           |
| GH30   | 7           |             |             |                 | 7              |             |             |
| GH31   |             |             | 2           | 19              |                |             |             |
| GH32   | 7           |             | 7           |                 | 3, 19          | 7           | 7           |
| GH36   | 6           |             |             |                 | 6              |             |             |
| GH37   |             |             |             |                 |                |             |             |
| GH39   | 3, 7        | 7           | 3, 7        | 7               | 3, 7           |             | 7           |
| GH43   | 7           | 7, 12       | 7           | 7, 11, 12       | 7, 12          | 7, 14       | 7           |
| GH45   |             |             |             |                 |                |             |             |
| GH47   | 16          |             | 16          | 16              |                | 16          |             |
| GH48   | 15          | 15          | 15          | 15              | 15             | 15          | 15          |
| GH53   | 7           | 7           | 7           | 7               | 7              | 7           | 7           |
| GH57   |             |             |             |                 |                |             |             |
| GH64   | 8           | 8           | 8           |                 | 8              | 8           |             |
| GH67   | 3           | 3           | 3           | 3               |                |             |             |
| GH76   |             |             |             |                 |                | 3, 7        |             |
| GH78   |             |             |             |                 |                |             | 7           |
| GH88   |             |             | 15          | 15              | 15             | 15          | 15          |
| GH95   | 3           |             |             |                 |                |             | 3           |
| GH97   |             |             |             |                 | 3              | 3           |             |
| GH108  |             |             |             | 20              |                |             |             |
| GH114  | 12          | 12          | 12          | 12              | 12             | 12          | 12          |
| GH115  | 7           | 7           | 7           | 7               | 7              | 7           |             |
| CE1    | 5, 7        | 5, 7        | 5, 7        | 5, 7            | 5, 7           | 5, 7        | 5, 7        |
| CE2    | 7, 14       | 7, 14       | 7, 14       | 7, 14           | 7, 14          | 3, 7        | 7           |
| CE3    | 7           | 7           | 7           | 7               | 7              | 7           | 7           |
| CE4    | 2, 5, 8, 12 | 2, 5, 8, 15 | 2, 5, 8     | 2, 5, 8, 12, 15 | 2, 5, 8        | 2, 5, 8, 15 | 5, 8, 15    |
| CE6    | 7           | 7           | 7           | 7               | 7              | 7           | 7           |
| CE7    | 7           |             |             |                 |                |             |             |
| CE8    | 19          | 19          | 19          | 19              | 19             | 19          | 19          |
| CE12   | 3, 13, 17   |             | 7           | 7, 13           | 7              | 3, 7        | 7, 17       |
| CE15   | 3           | 3, 5        | 3           | 3               | 3, 5           | 3           | 3           |
| CE16   |             |             |             |                 | 19             |             |             |
| PL1    | 2           | 2           | 2, 12       | 2, 12           | 2              | 2, 12       | 2, 12       |
| PL3    |             |             |             |                 |                |             |             |
| PL4    | 19          | 19          | 19          | 19              | 19             | 19          | 19          |
| PL9    | 7, 14       |             | 7, 14       | 9, 14           | 7              |             | 14          |
| PL11   | 1           |             |             |                 | 7              |             |             |

**KEY**

|    |                          |           |                |
|----|--------------------------|-----------|----------------|
| 1  | Acidobacteria            | Bacteria  |                |
| 2  | Actinobacteria           |           |                |
| 3  | Bacteroidetes            |           |                |
| 4  | Deinococcus              |           |                |
| 5  | Fibrobacter              |           |                |
| 6  | Bacillales               |           | Firmicutes     |
| 7  | Clostridiales            |           |                |
| 8  | Unclassified Firmicutes  |           |                |
| 9  | Lentisphaerae            |           |                |
| 10 | Alpha-Proteobacteria     |           | Proteobacteria |
| 11 | Beta-Proteobacteria      |           |                |
| 12 | Gamma-Proteobacteria     |           |                |
| 13 | Delta-Proteobacteria     |           |                |
| 14 | Spirochaetes             |           |                |
| 15 | Bacteria (unnested)      |           |                |
| 16 | Arthropoda               | Eukaryota |                |
| 17 | Metazoa                  |           |                |
| 18 | Mollusca                 |           |                |
| 19 | Viridiplantae            |           |                |
| 20 | Neagelaria/Cyanobacteria |           |                |

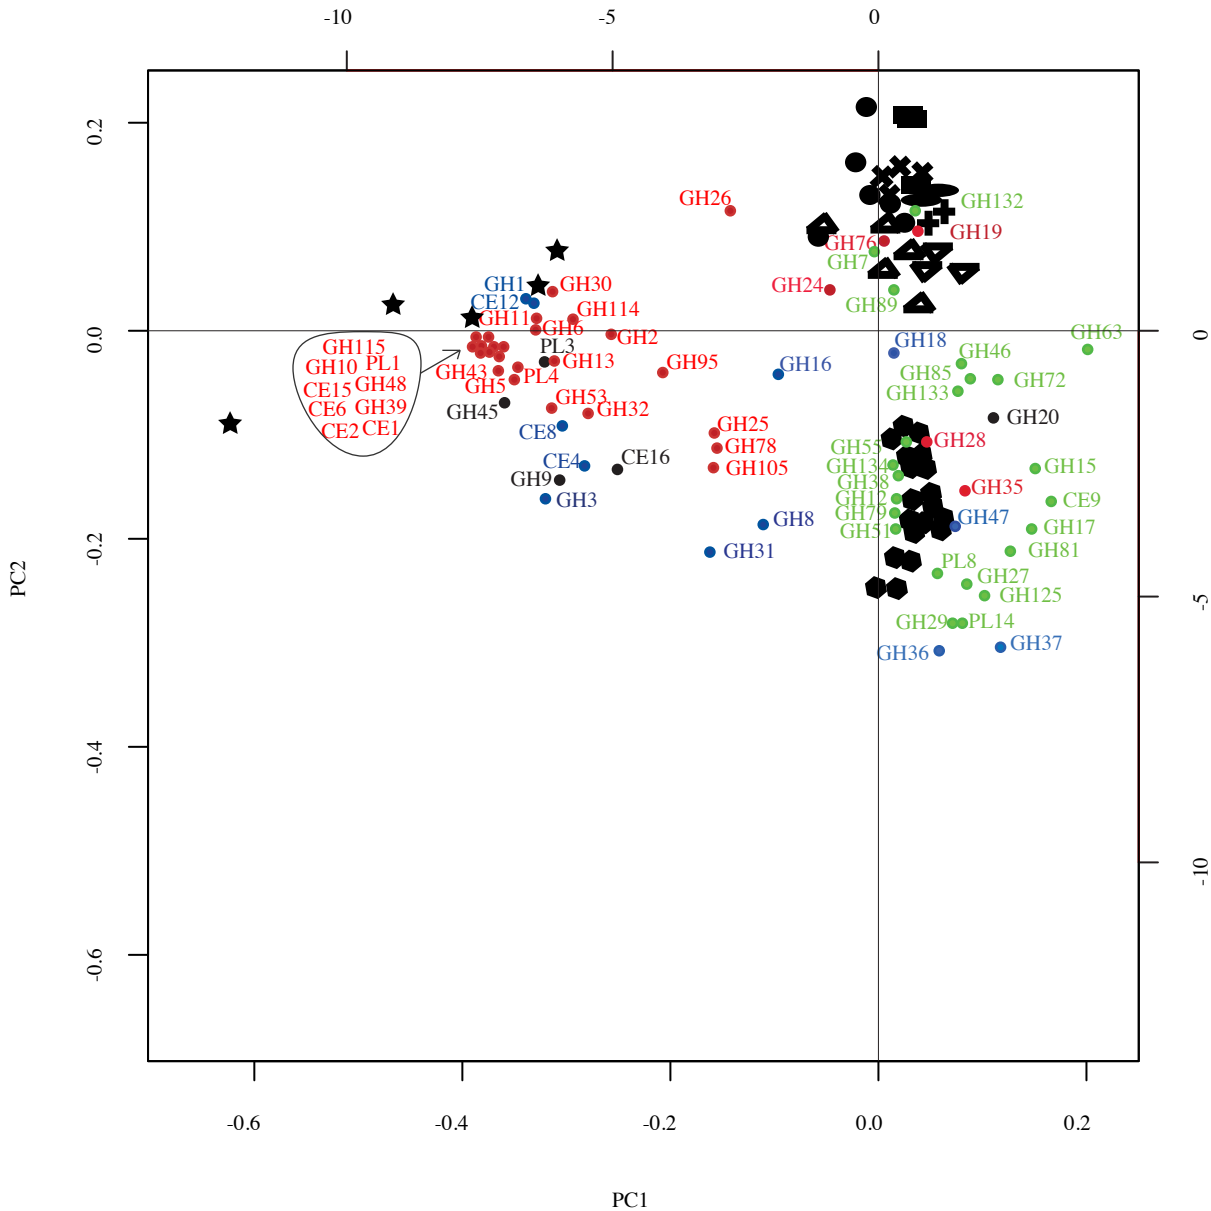

**Table 1: Neocallimastigomycota strains analyzed in this study.**

| Genus                 | Species                  | Strain | Host                                        | Isolation source | Location         | LSU Genbank accession number | Reference                                 |
|-----------------------|--------------------------|--------|---------------------------------------------|------------------|------------------|------------------------------|-------------------------------------------|
| <i>Anaeromyces</i>    | <i>contortus</i>         | C3G    | Cow ( <i>Bos taurus</i> )                   | Feces            | Stillwater, OK   | MF121936                     | This study                                |
| <i>Anaeromyces</i>    | <i>contortus</i>         | C3J    | Cow ( <i>Bos taurus</i> )                   | Feces            | Stillwater, OK   | MF121942                     | This study                                |
| <i>Anaeromyces</i>    | <i>contortus</i>         | G3G    | Goat ( <i>Capra aegagrus hircus</i> )       | Feces            | Stillwater, OK   | MF121935                     | This study                                |
| <i>Anaeromyces</i>    | <i>contortus</i>         | Na     | Cow ( <i>Bos taurus</i> )                   | Feces            | Stillwater, OK   | MF121943                     | This study                                |
| <i>Anaeromyces</i>    | <i>contortus</i>         | O2     | Cow ( <i>Bos taurus</i> )                   | Feces            | Stillwater, OK   | MF121931                     | This study                                |
| <i>Anaeromyces</i>    | <i>robustus</i>          | S4     | Sheep ( <i>Ovis aries</i> )                 | Feces            | Santa Barbara, C | NA*                          | {Haitjema, 2017 #19}                      |
| <i>Caecomyces</i>     | sp.                      | Iso3   | Cow ( <i>Bos taurus</i> )                   | Feces            | Stillwater, OK   | MG992499                     | This study                                |
| <i>Caecomyces</i>     | sp.                      | Brit4  | Cow ( <i>Bos taurus</i> )                   | Rumen            | Stillwater, OK   | MG992500                     | This study                                |
| <i>Feromyces</i>      | <i>austinii</i>          | F2c    | Aoudad sheep ( <i>Ammotragus leucurus</i> ) | Feces            | Stillwater, OK   | MG605675                     | This study                                |
| <i>Feromyces</i>      | <i>austinii</i>          | F3a    | Aoudad sheep ( <i>Ammotragus leucurus</i> ) | Feces            | Stillwater, OK   | MG584226                     | This study                                |
| <i>Neocallimastix</i> | <i>californiae</i>       | G1     | Horse ( <i>Equus caballus</i> )             | Feces            | Santa Barbara, C | Genomic sequence**           | {Haitjema, 2017 #19}                      |
| <i>Neocallimastix</i> | cf. <i>cameroonensis</i> | G3     | Sheep ( <i>Ovis aries</i> )                 | Feces            | Stillwater, OK   | MG992493                     | This study                                |
| <i>Neocallimastix</i> | cf. <i>frontalis</i>     | Hef5   | Cow ( <i>Bos taurus</i> )                   | Feces            | Stillwater, OK   | MG992494                     | This study                                |
| <i>Orpinomyces</i>    | cf. <i>joyonii</i>       | D3A    | Cow ( <i>Bos taurus</i> )                   | Digesta          | Stillwater, OK   | MG992487                     | This study                                |
| <i>Orpinomyces</i>    | cf. <i>joyonii</i>       | D3B    | Cow ( <i>Bos taurus</i> )                   | Digesta          | Stillwater, OK   | MG992488                     | This study                                |
| <i>Orpinomyces</i>    | cf. <i>joyonii</i>       | D4C    | Cow ( <i>Bos taurus</i> )                   | Digesta          | Stillwater, OK   | MG992489                     | This study                                |
| <i>Pecoramyces</i>    | <i>ruminantium</i>       | C1A    | Cow ( <i>Bos taurus</i> )                   | Feces            | Stillwater, OK   | JN939127                     | {Youssef, 2013 #96;Couger, 2015 #95}      |
| <i>Pecoramyces</i>    | <i>ruminantium</i>       | S4B    | Sheep ( <i>Ovis aries</i> )                 | Feces            | Stillwater, OK   | KX961618                     | This study                                |
| <i>Pecoramyces</i>    | <i>ruminantium</i>       | FS3C   | Cow ( <i>Bos taurus</i> )                   | Rumen            | Stillwater, OK   | MG992492                     | This study                                |
| <i>Pecoramyces</i>    | <i>ruminantium</i>       | FX4B   | Cow ( <i>Bos taurus</i> )                   | Rumen            | Stillwater, OK   | MG992491                     | This study                                |
| <i>Pecoramyces</i>    | <i>ruminantium</i>       | YC3    | Cow ( <i>Bos taurus</i> )                   | Rumen            | Stillwater, OK   | MG992490                     | This study                                |
| <i>Piromyces</i>      | <i>finnis</i>            | finn   | Horse ( <i>Equus caballus</i> )             | Feces            | Santa Barbara, C | Genomic sequence**           | {Haitjema, 2017 #19}                      |
| <i>Piromyces</i>      | sp.                      | A1     | Sheep ( <i>Ovis aries</i> )                 | Feces            | Stillwater, OK   | MG992496                     | This study                                |
| <i>Piromyces</i>      | sp.                      | A2     | Sheep ( <i>Ovis aries</i> )                 | Feces            | Stillwater, OK   | MG992495                     | This study                                |
| <i>Piromyces</i>      | sp.                      | B4     | Cow ( <i>Bos taurus</i> )                   | Feces            | Stillwater, OK   | MG992497                     | This study                                |
| <i>Piromyces</i>      | sp.                      | B5     | Cow ( <i>Bos taurus</i> )                   | Feces            | Stillwater, OK   | MG992498                     | This study                                |
| <i>Piromyces</i>      | sp.                      | E2     | Indian Elephant ( <i>Elephas maximus</i> )  | Feces            | London, UK       | NA                           | {Haitjema, 2017 #19;Teunissen, 1991 #120} |

\*NA: Not available

\*\* LSU sequence was extracted from the genomic assembly. No LSU accession number was available.
